# Supplementary material
Source: MDPI journal article supplement (https://www.mdpi.com/2073-4441/15/6/1042)

# Pre-alpine river – 421a

Initial design

28.11.2022

## 421a - General

### River:

- Pre-alpine river
- Discharge:  $50 \text{ m}^3/\text{s}$
- Mean flow velocity:  $0.36 \text{ m/s}$
- River width: 35 m
- Weir width: 16 m
- Flow depth: 4 m
- No slope

### Turbines:

- 6 turbines with 1.4 m diameter
- Design discharge:  $48 \text{ m}^3/\text{s}$
- Head: 3 m
- Headrace channel width: 15 m

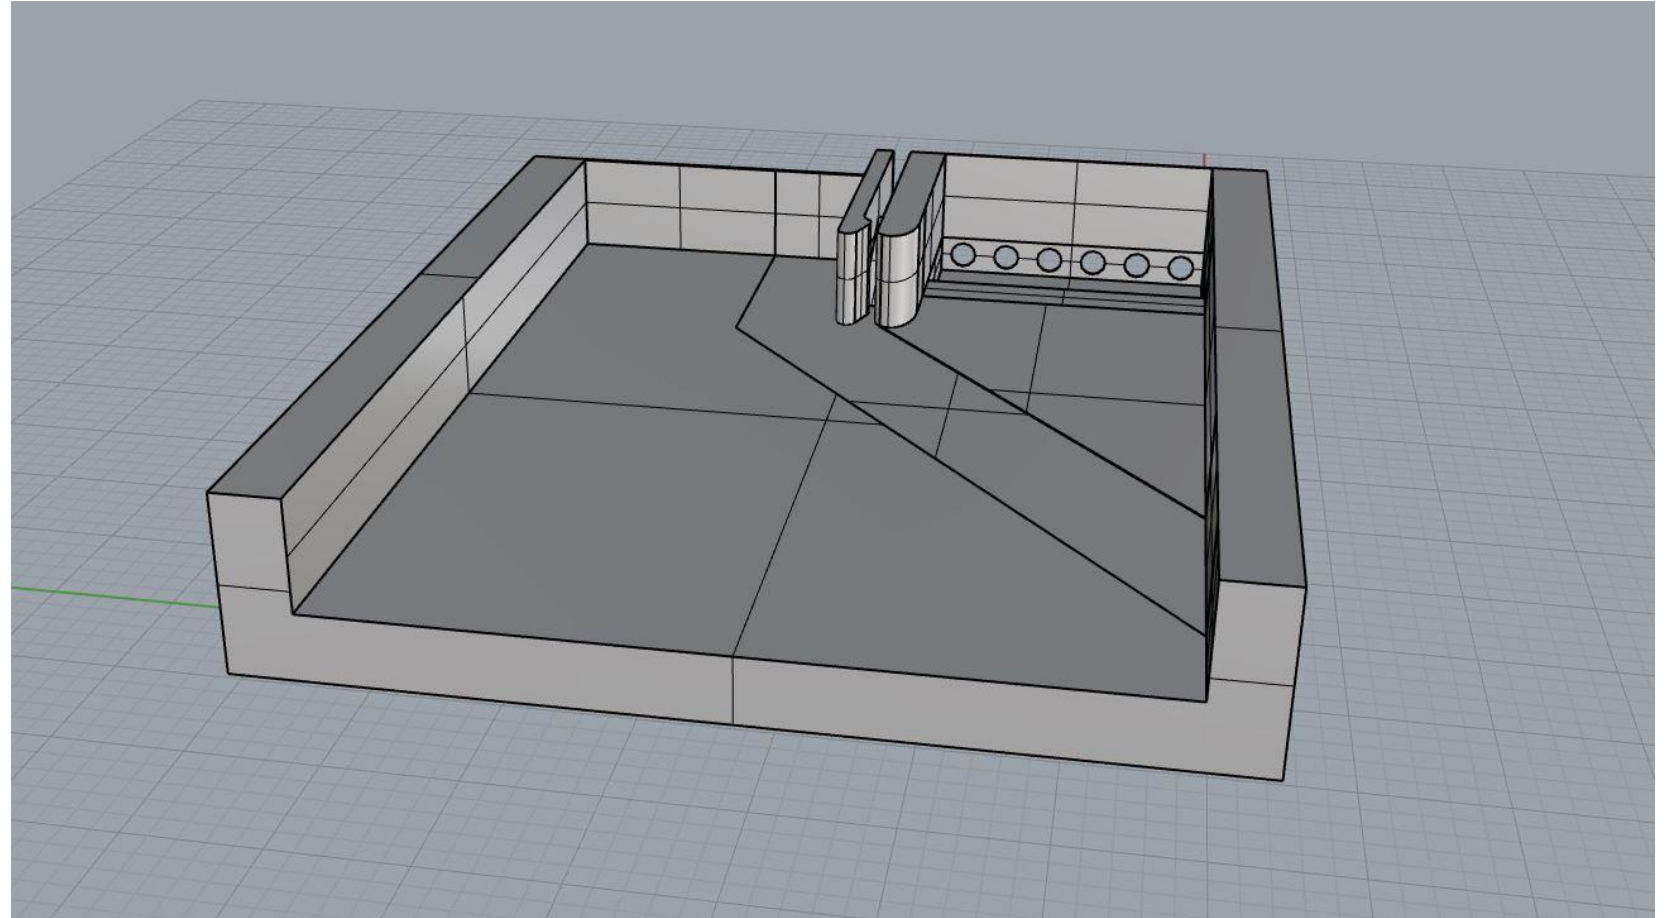

# 421a - General

## Bypass:

- Based on the angled bar rack bypass system by Ebel, Gluch & Kehl
- Bypass width: 1 m
- Ramp inclination:  $26.6^\circ$
- $Q$  (Bypass):  $2 \text{ m}^3/\text{s}$  (4.0% of  $Q_{\text{River}}$ )

## Dividing pier – turbine-side part:

- Based on Häusler
- Width  $B$ : 2 m
- Length: 15 m
- $a_1 = b_1 = 0.77 \text{ m}$
- $b_2 = 1.23 \text{ m}$
- $a_2 = 2.31 \text{ m}$

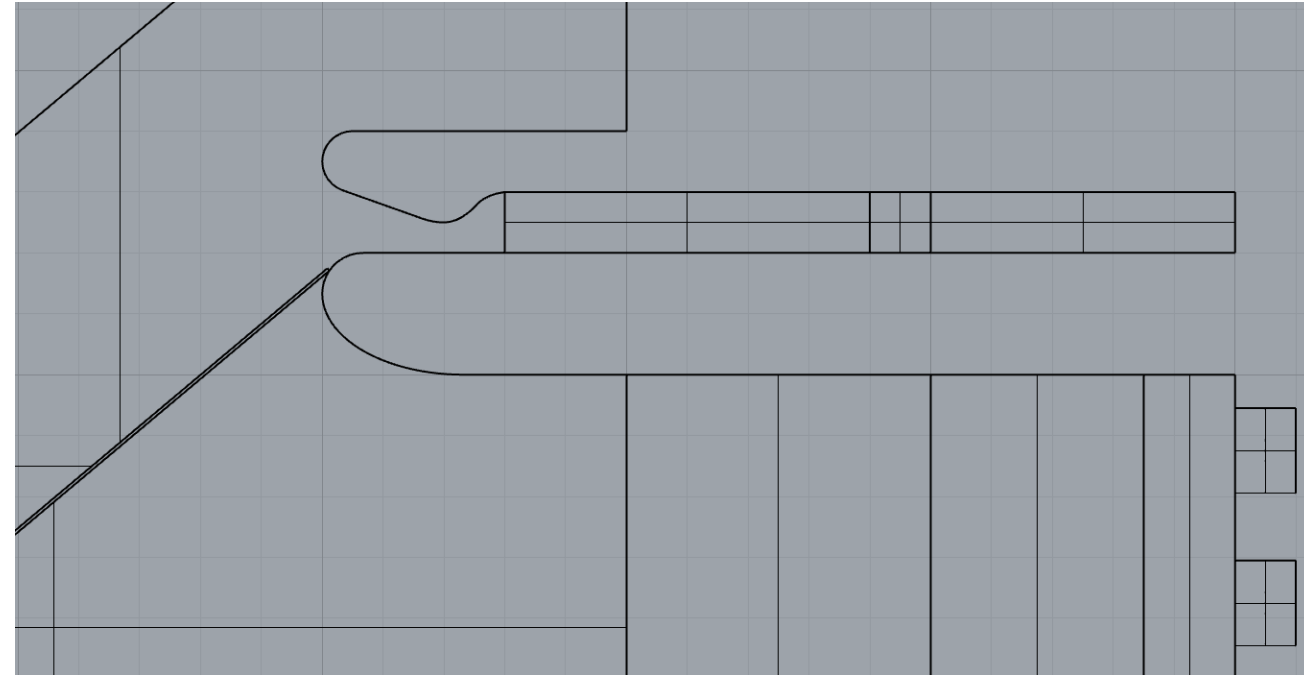

Layout of the bypass and dividing pier

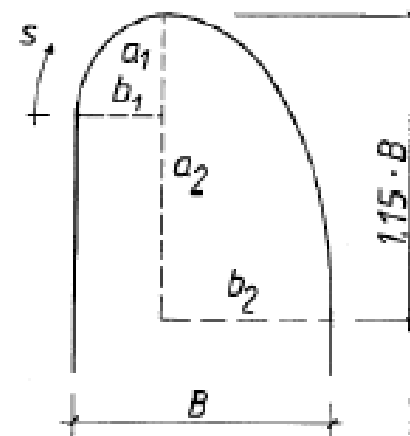

$$\begin{aligned} b_1 &= 1/3 \cdot B \\ a_1 &= 1.15 \cdot b_1 \\ b_2 &= 2/3 \cdot B \\ a_2 &= 3 \cdot a_1 \end{aligned}$$

Trennpfeilerkopfgestaltung nach Häusler

## 421a - General

### Dividing pier – weir-side part:

- Width: 1 m
- Shape: Circular rounded
- Inlet gate: „Streamlined“ with 0.5 m width over the whole water column

### Fish guidance structure (FGS):

- Rack length: 25.94 m
- Mean velocity at rack:  
 $v = Q/A = 0.46 \text{ m/s}$
- Circular bar trash rack with 40° angle to the unaffected flow direction
- Head loss values depending on the horizontal inflow angle and the rack configuration



Layout of the bypass and dividing pier

CBTR, 50% blocking ratio  
(Formula: mod. Meusburger)

| Degree | Head loss value |
|--------|-----------------|
| 10     | 0.31            |
| 20     | 0.61            |
| 30     | 0.90            |
| 40     | 1.15            |
| 50     | 1.37            |
| 60     | 1.55            |
| 70     | 1.68            |
| 80     | 1.76            |
| 90     | 1.79            |

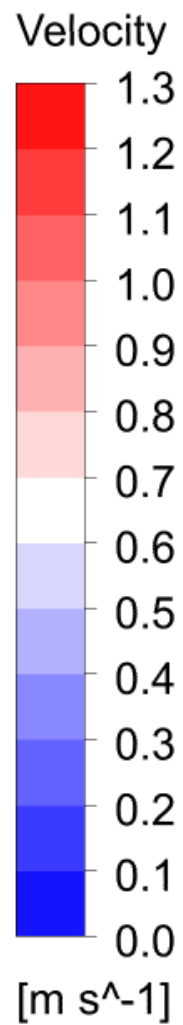

421a – Velocity

z = 0.1 m above river bed

Vectors:

- Rectangular grid: 1 x 1 m
- Vector length: approx. 0.75 m

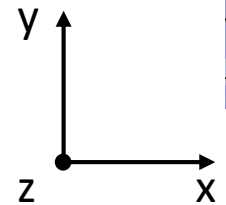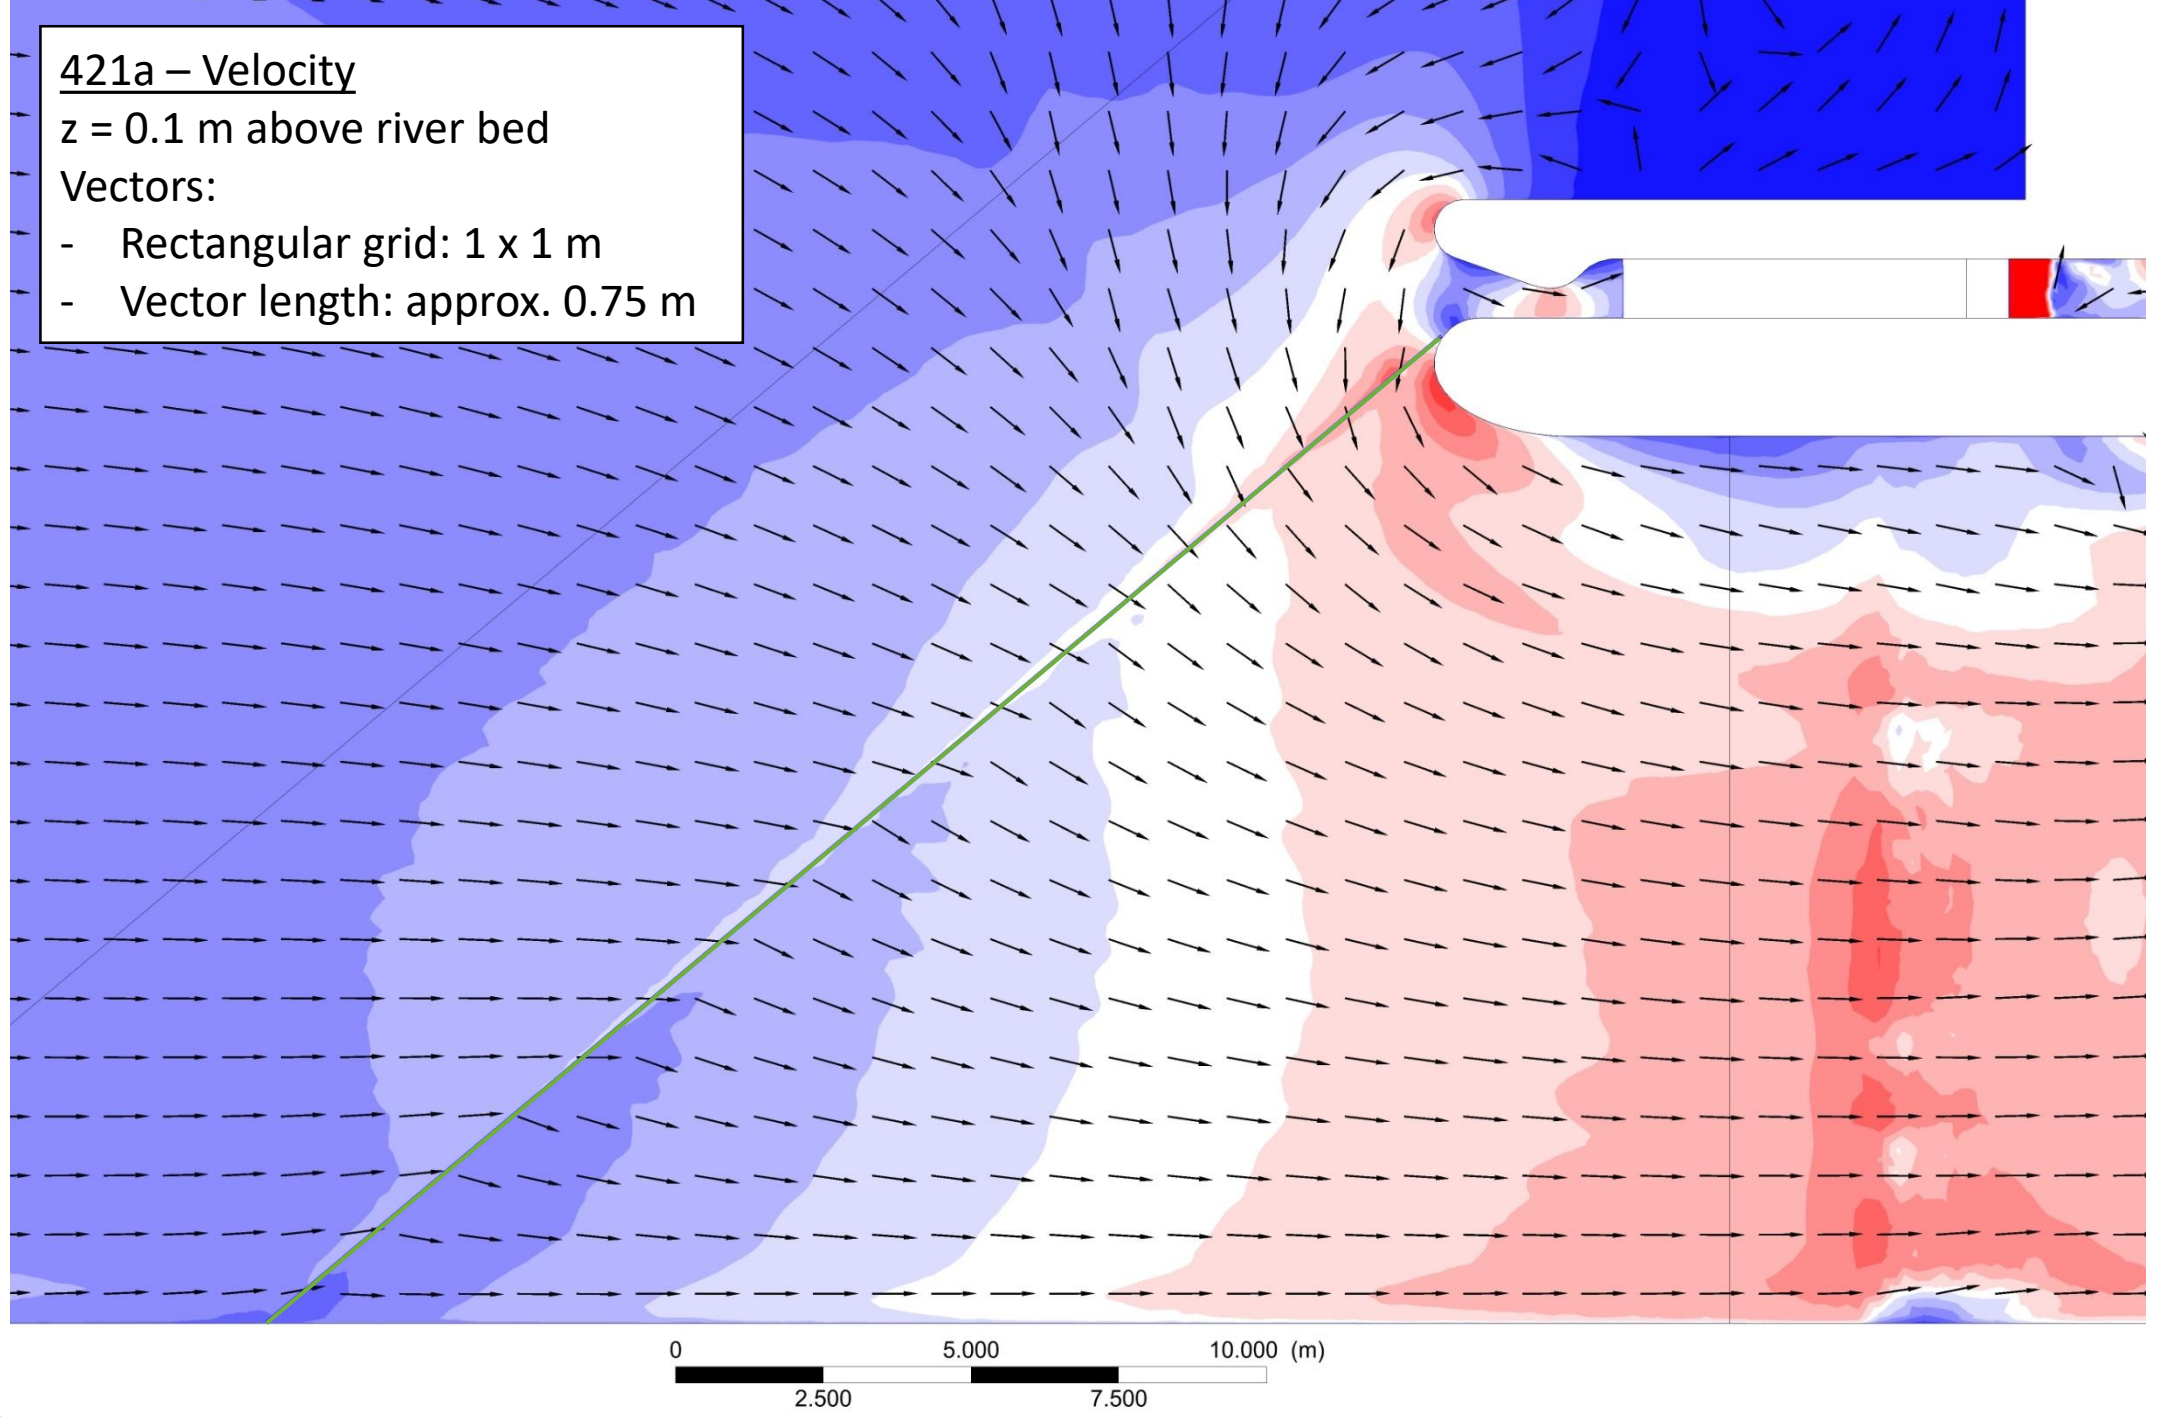



Velocity

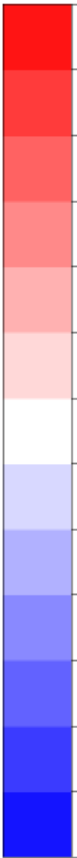

[m s<sup>-1</sup>]

421a – Velocity

z = 2.0 m above river bed

Vectors:

- Rectangular grid: 1 x 1 m
- Vector length: approx. 0.75 m

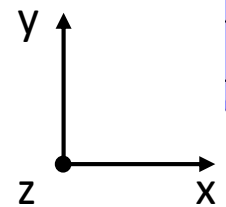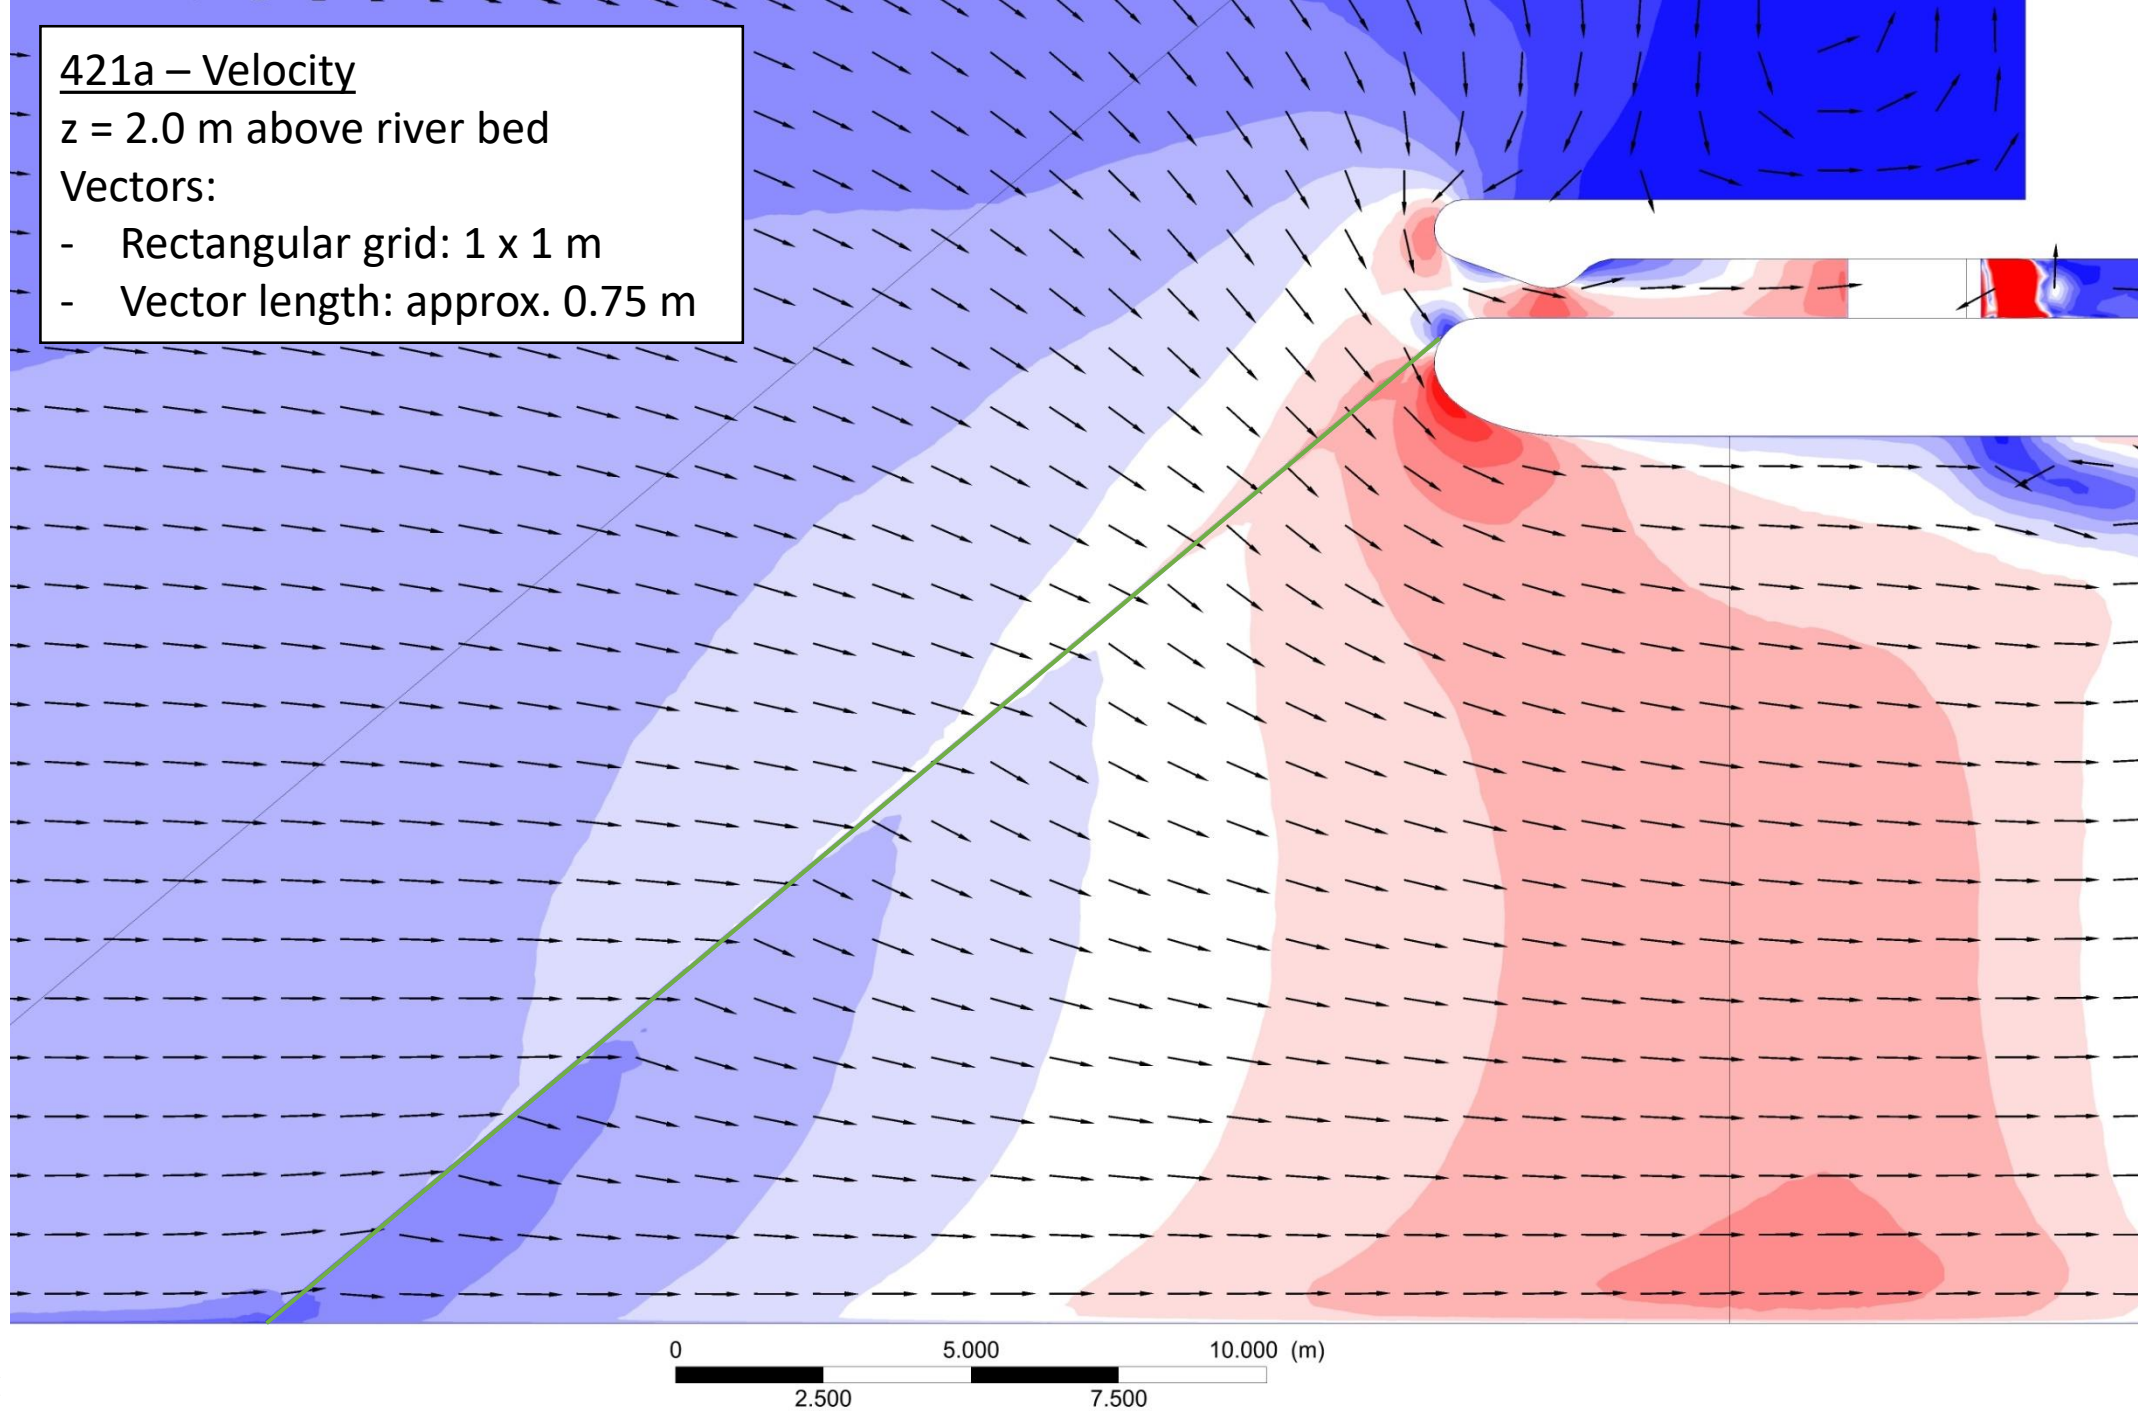

Velocity

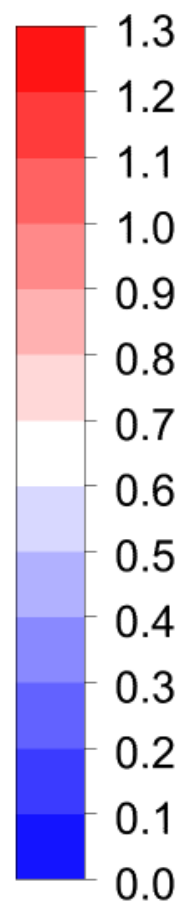

[m s<sup>-1</sup>]

421a – Velocity

z = 3.5 m above river bed

Vectors:

- Rectangular grid: 1 x 1 m
- Vector length: approx. 0.75 m

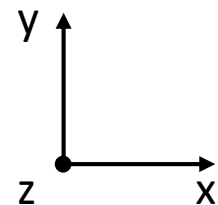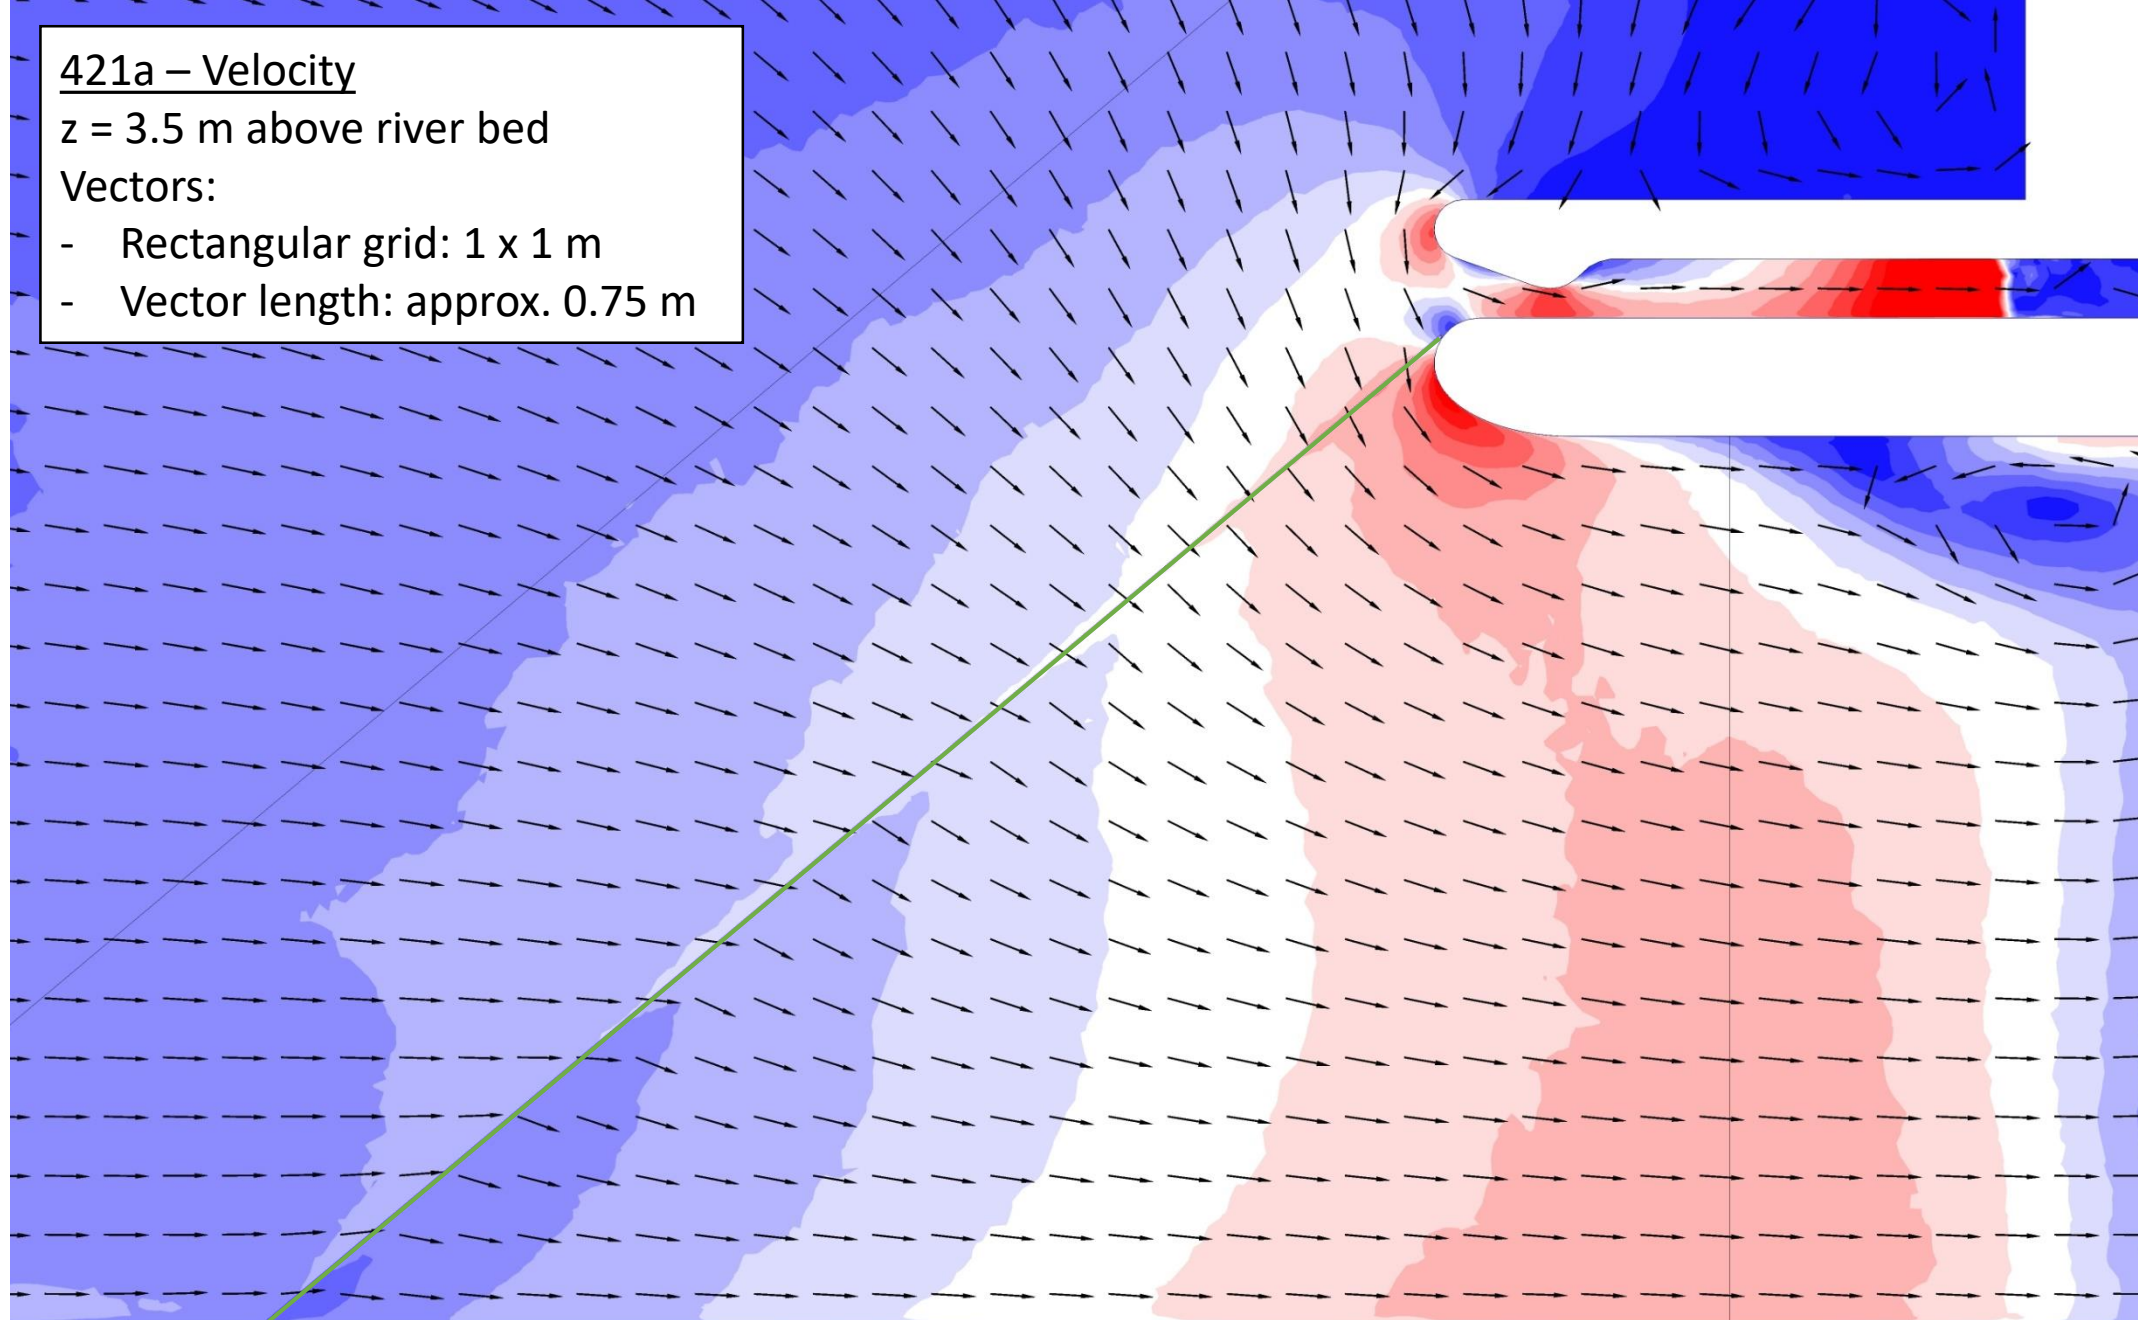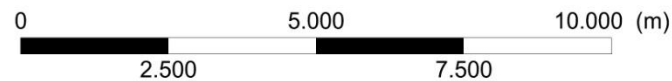





421a – Velocity

$z = 0.1$  m above river bed

Vectors:

- Rectangular grid: 0.5 x 0.5 m
- Vector length: approx. 0.4 m

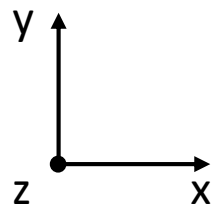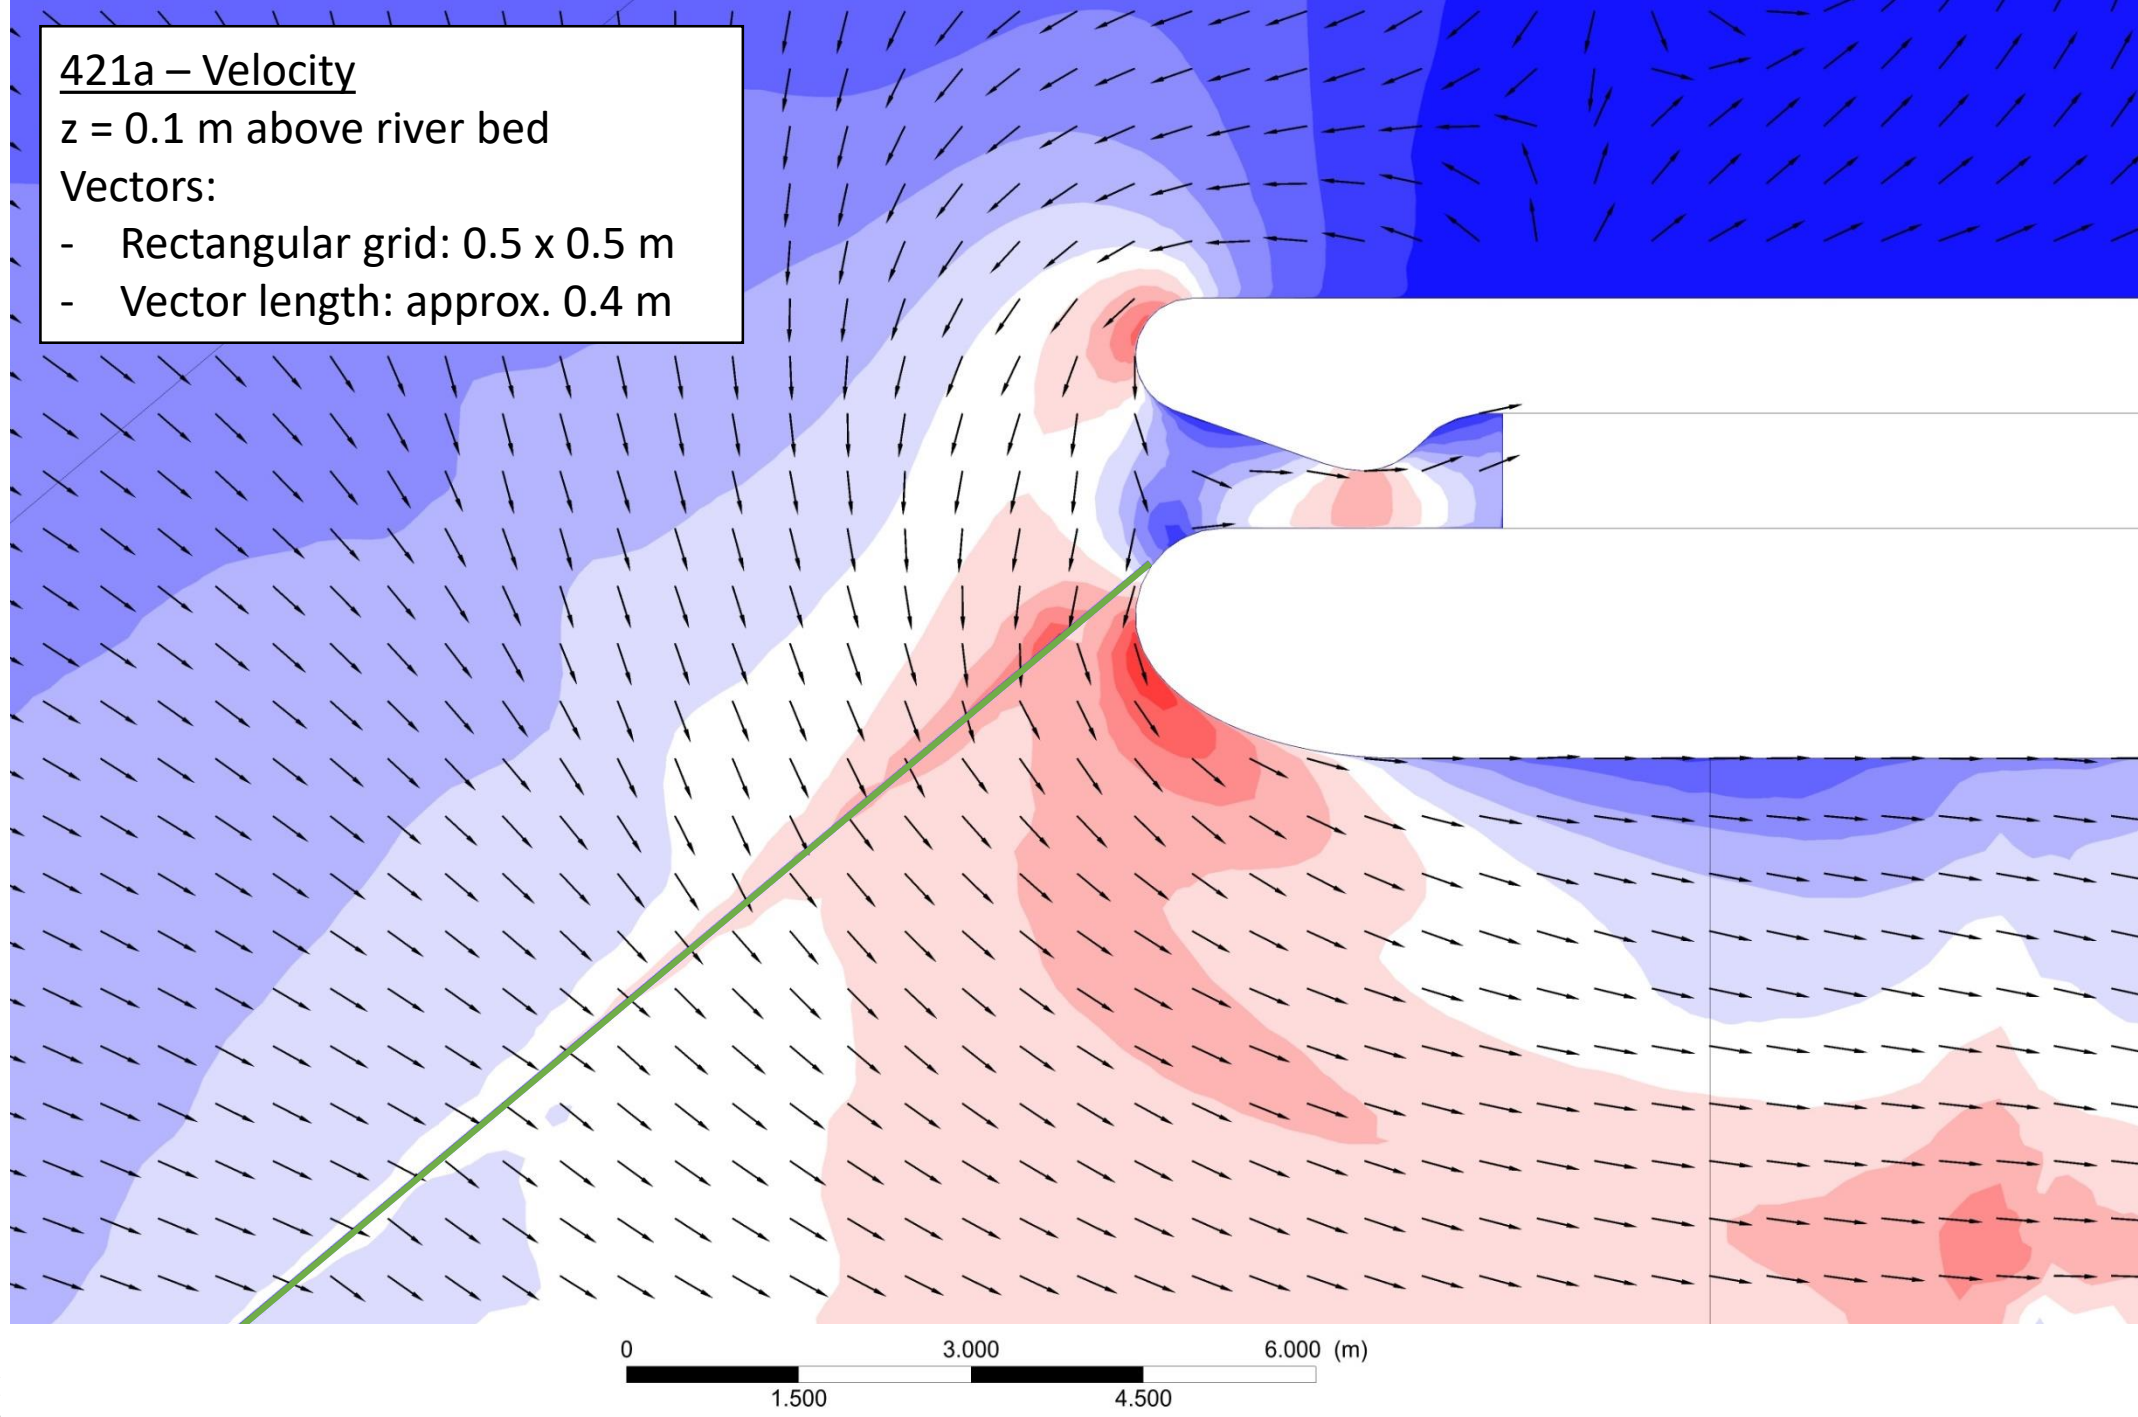



Velocity



[m s<sup>-1</sup>]

### 421a – Velocity

z = 2.0 m above river bed

Vectors:

- Rectangular grid: 0.5 x 0.5 m
- Vector length: approx. 0.4 m

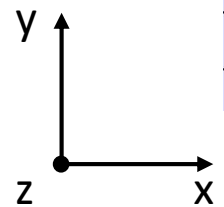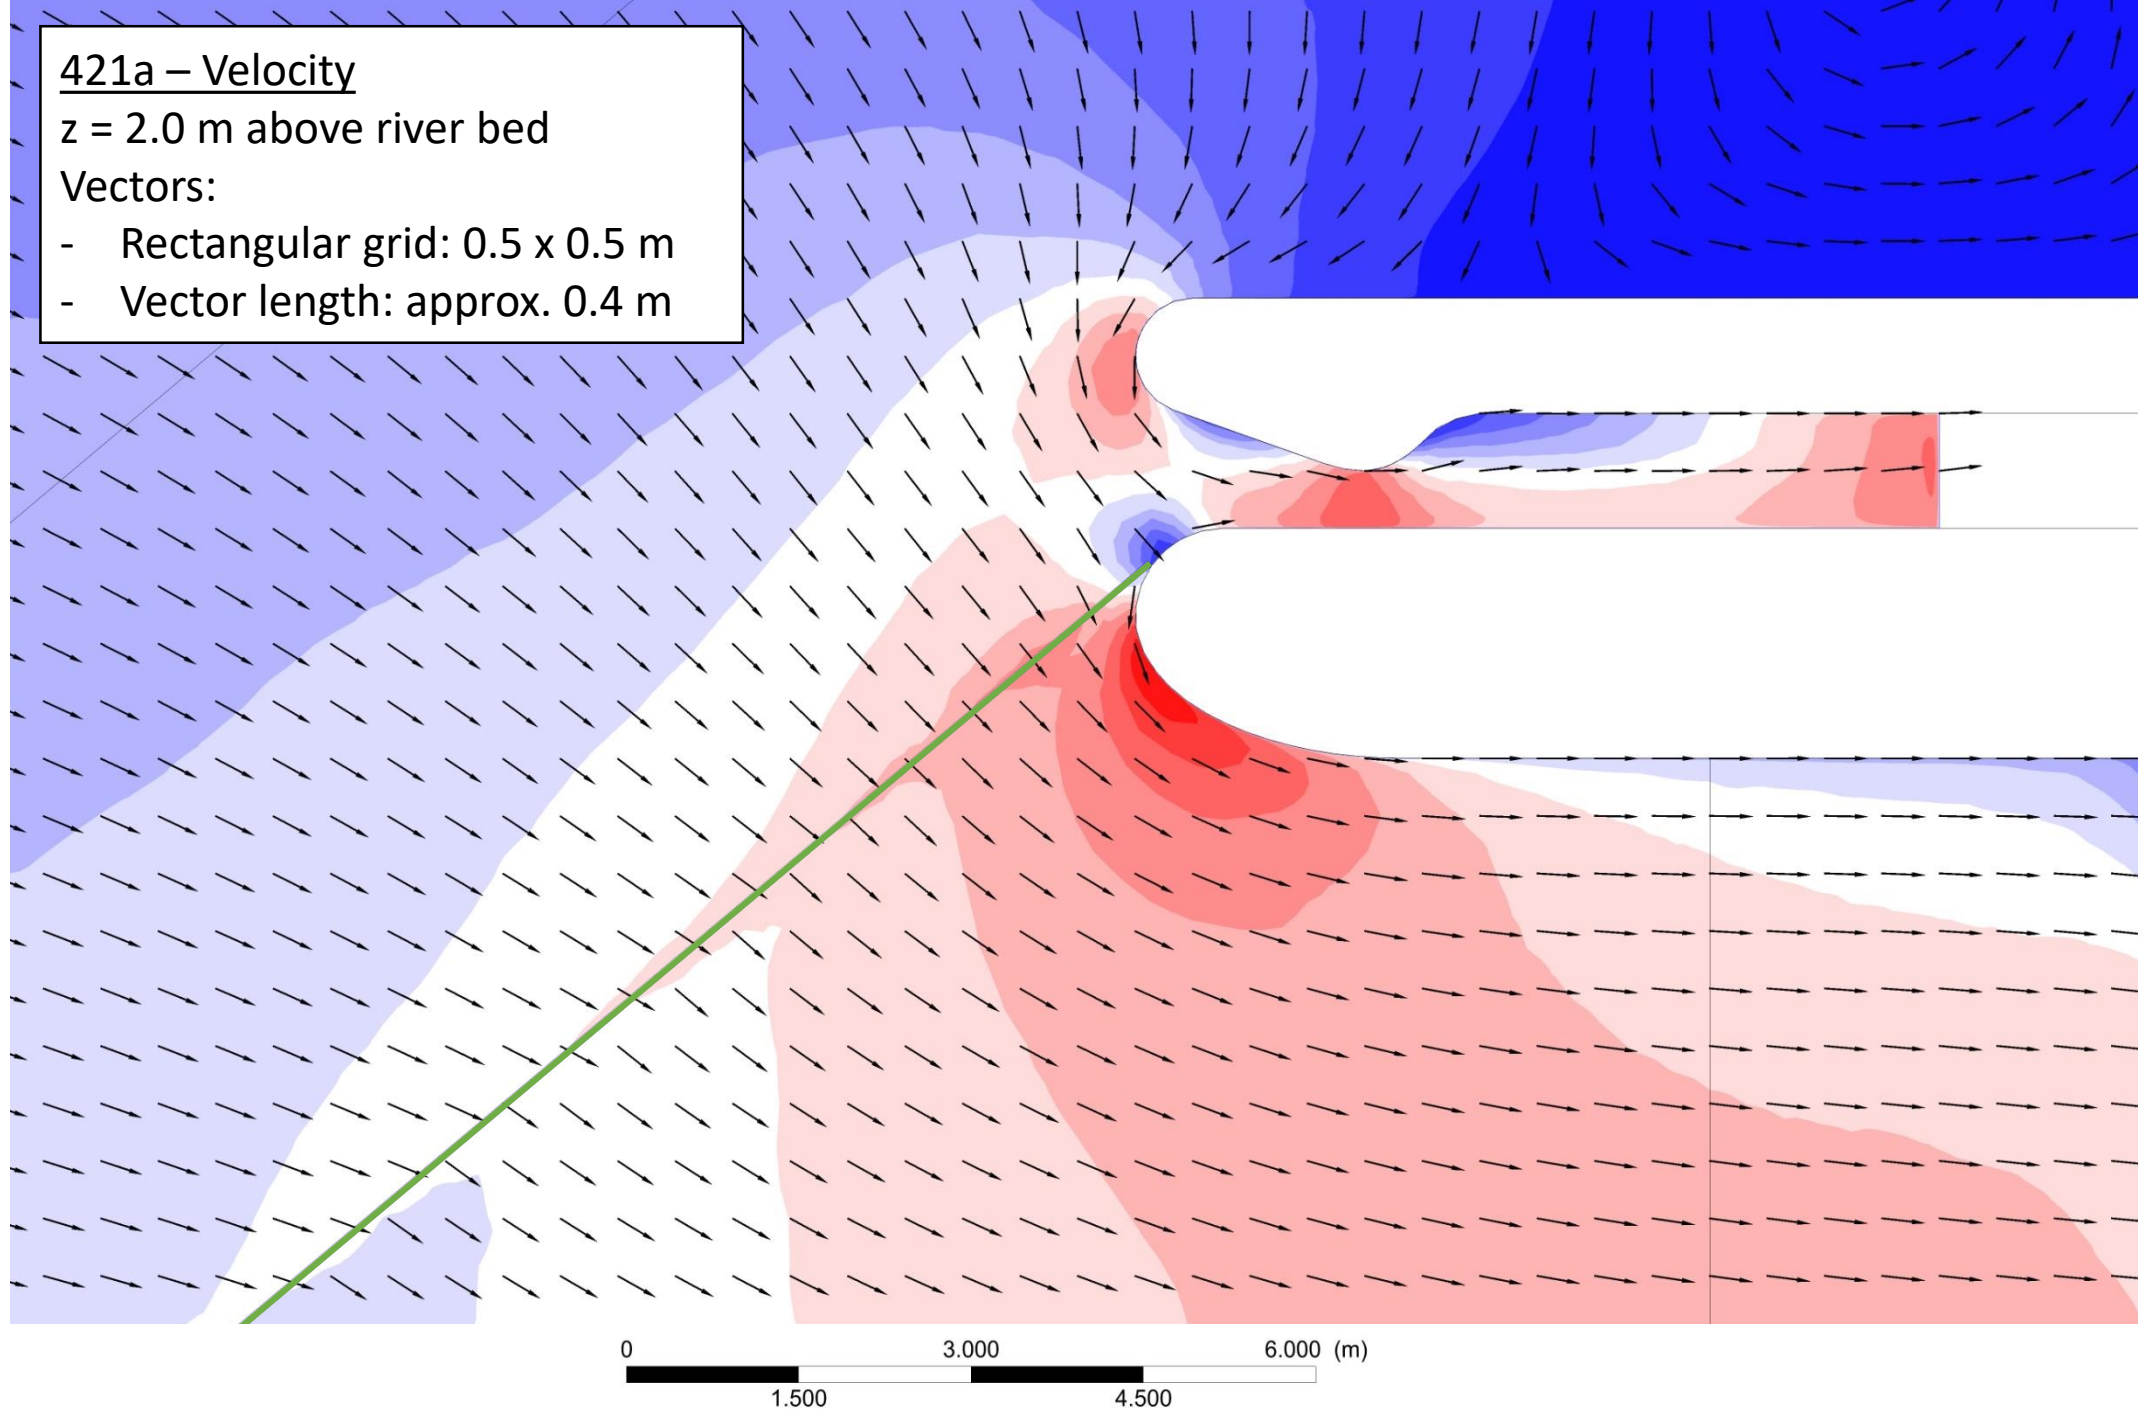



421a – Velocity

z = 3.5 m above river bed

Vectors:

- Rectangular grid: 0.5 x 0.5 m
- Vector length: approx. 0.4 m

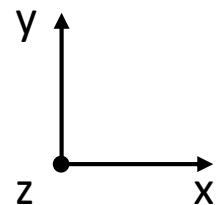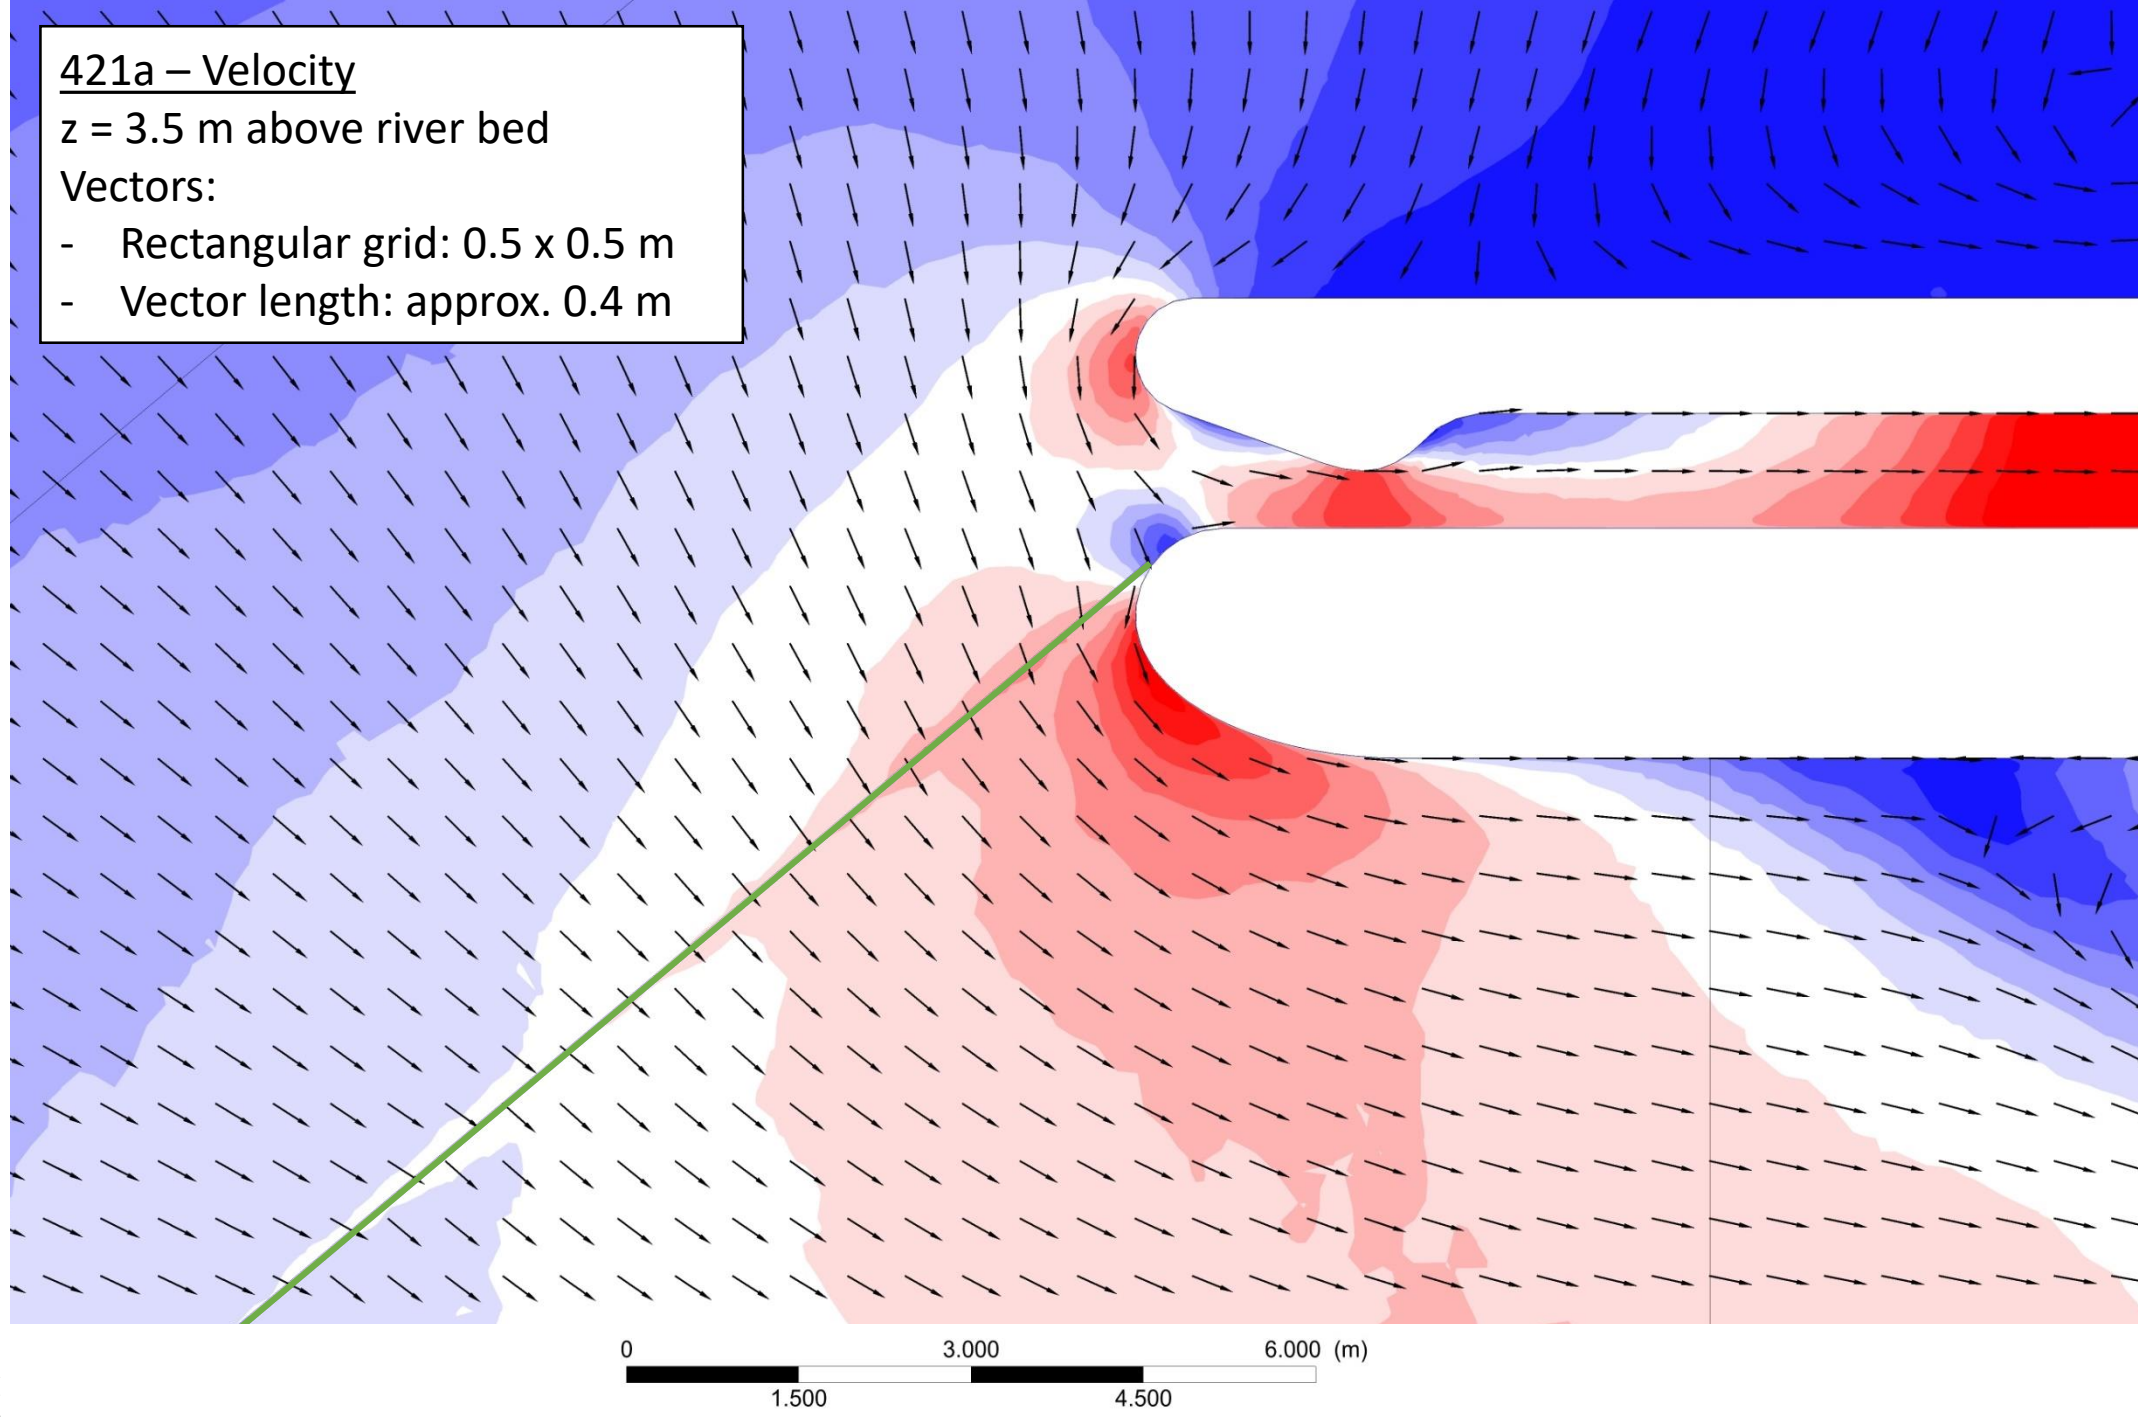



Velocity  
1.3  
1.2  
1.1  
1.0  
0.9  
0.8  
0.7  
0.6  
0.5  
0.4  
0.3  
0.2  
0.1  
0.0  
[m s<sup>-1</sup>]

421a – Velocity

z = 0.1 m above river bed

Vectors:

- Rectangular grid: 0.2 x 0.2 m
- Vector length: approx. 0.2 m

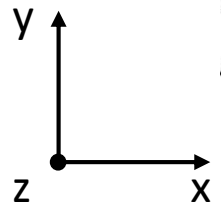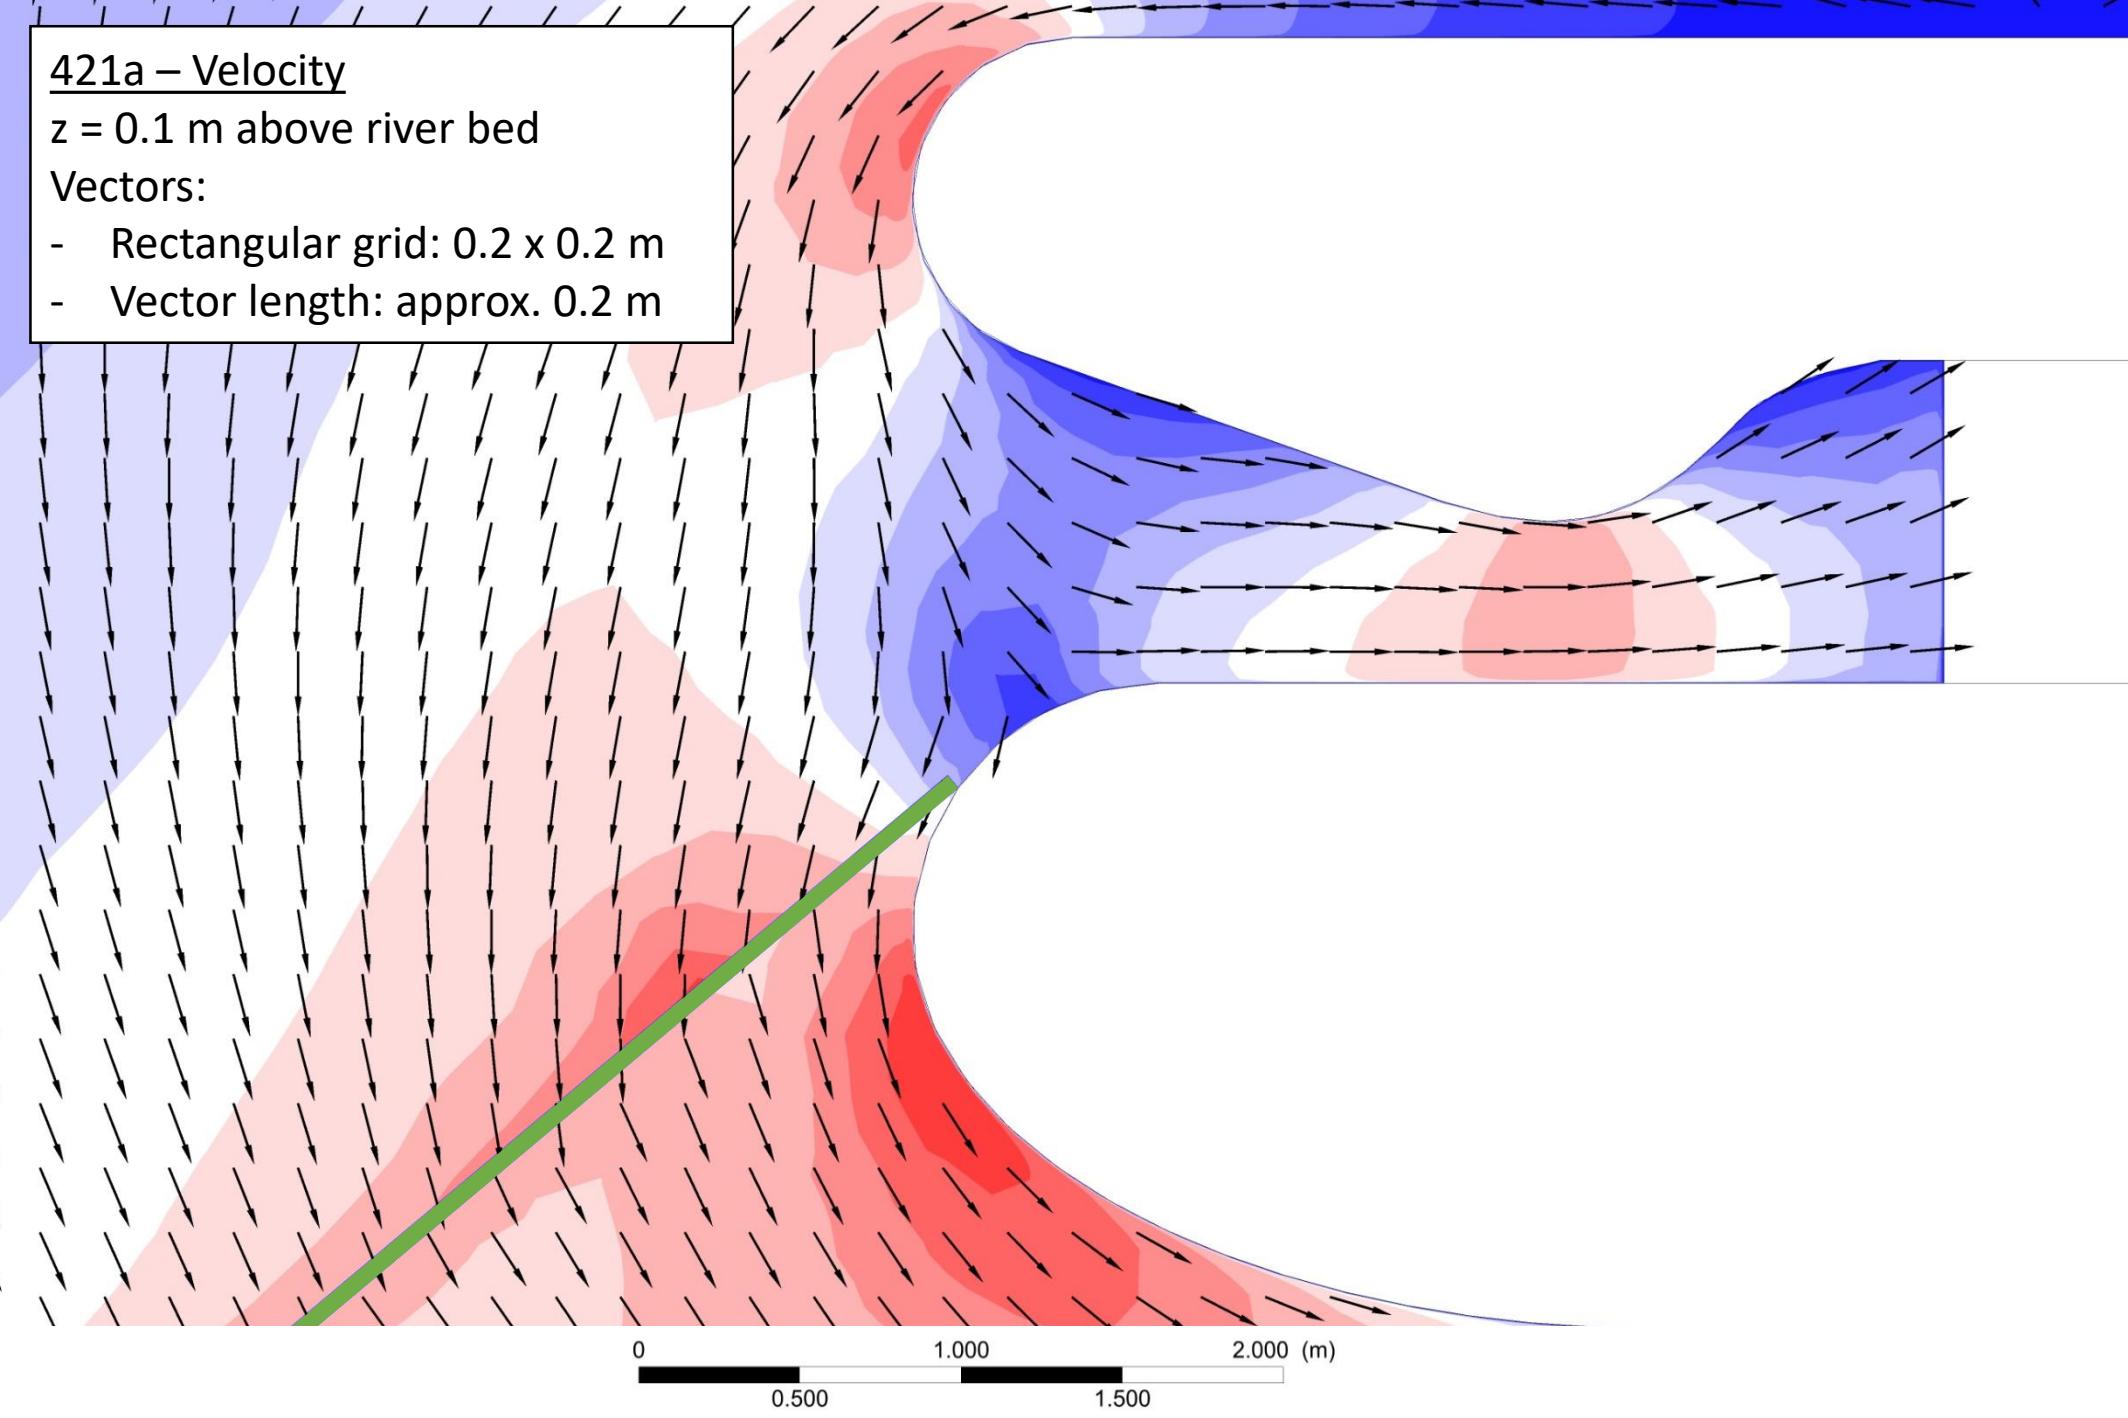



421a – Velocity

z = 2.0 m above river bed

Vectors:

- Rectangular grid: 0.2 x 0.2 m
- Vector length: approx. 0.2 m

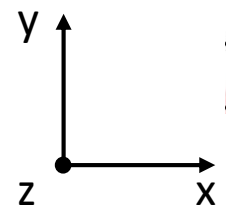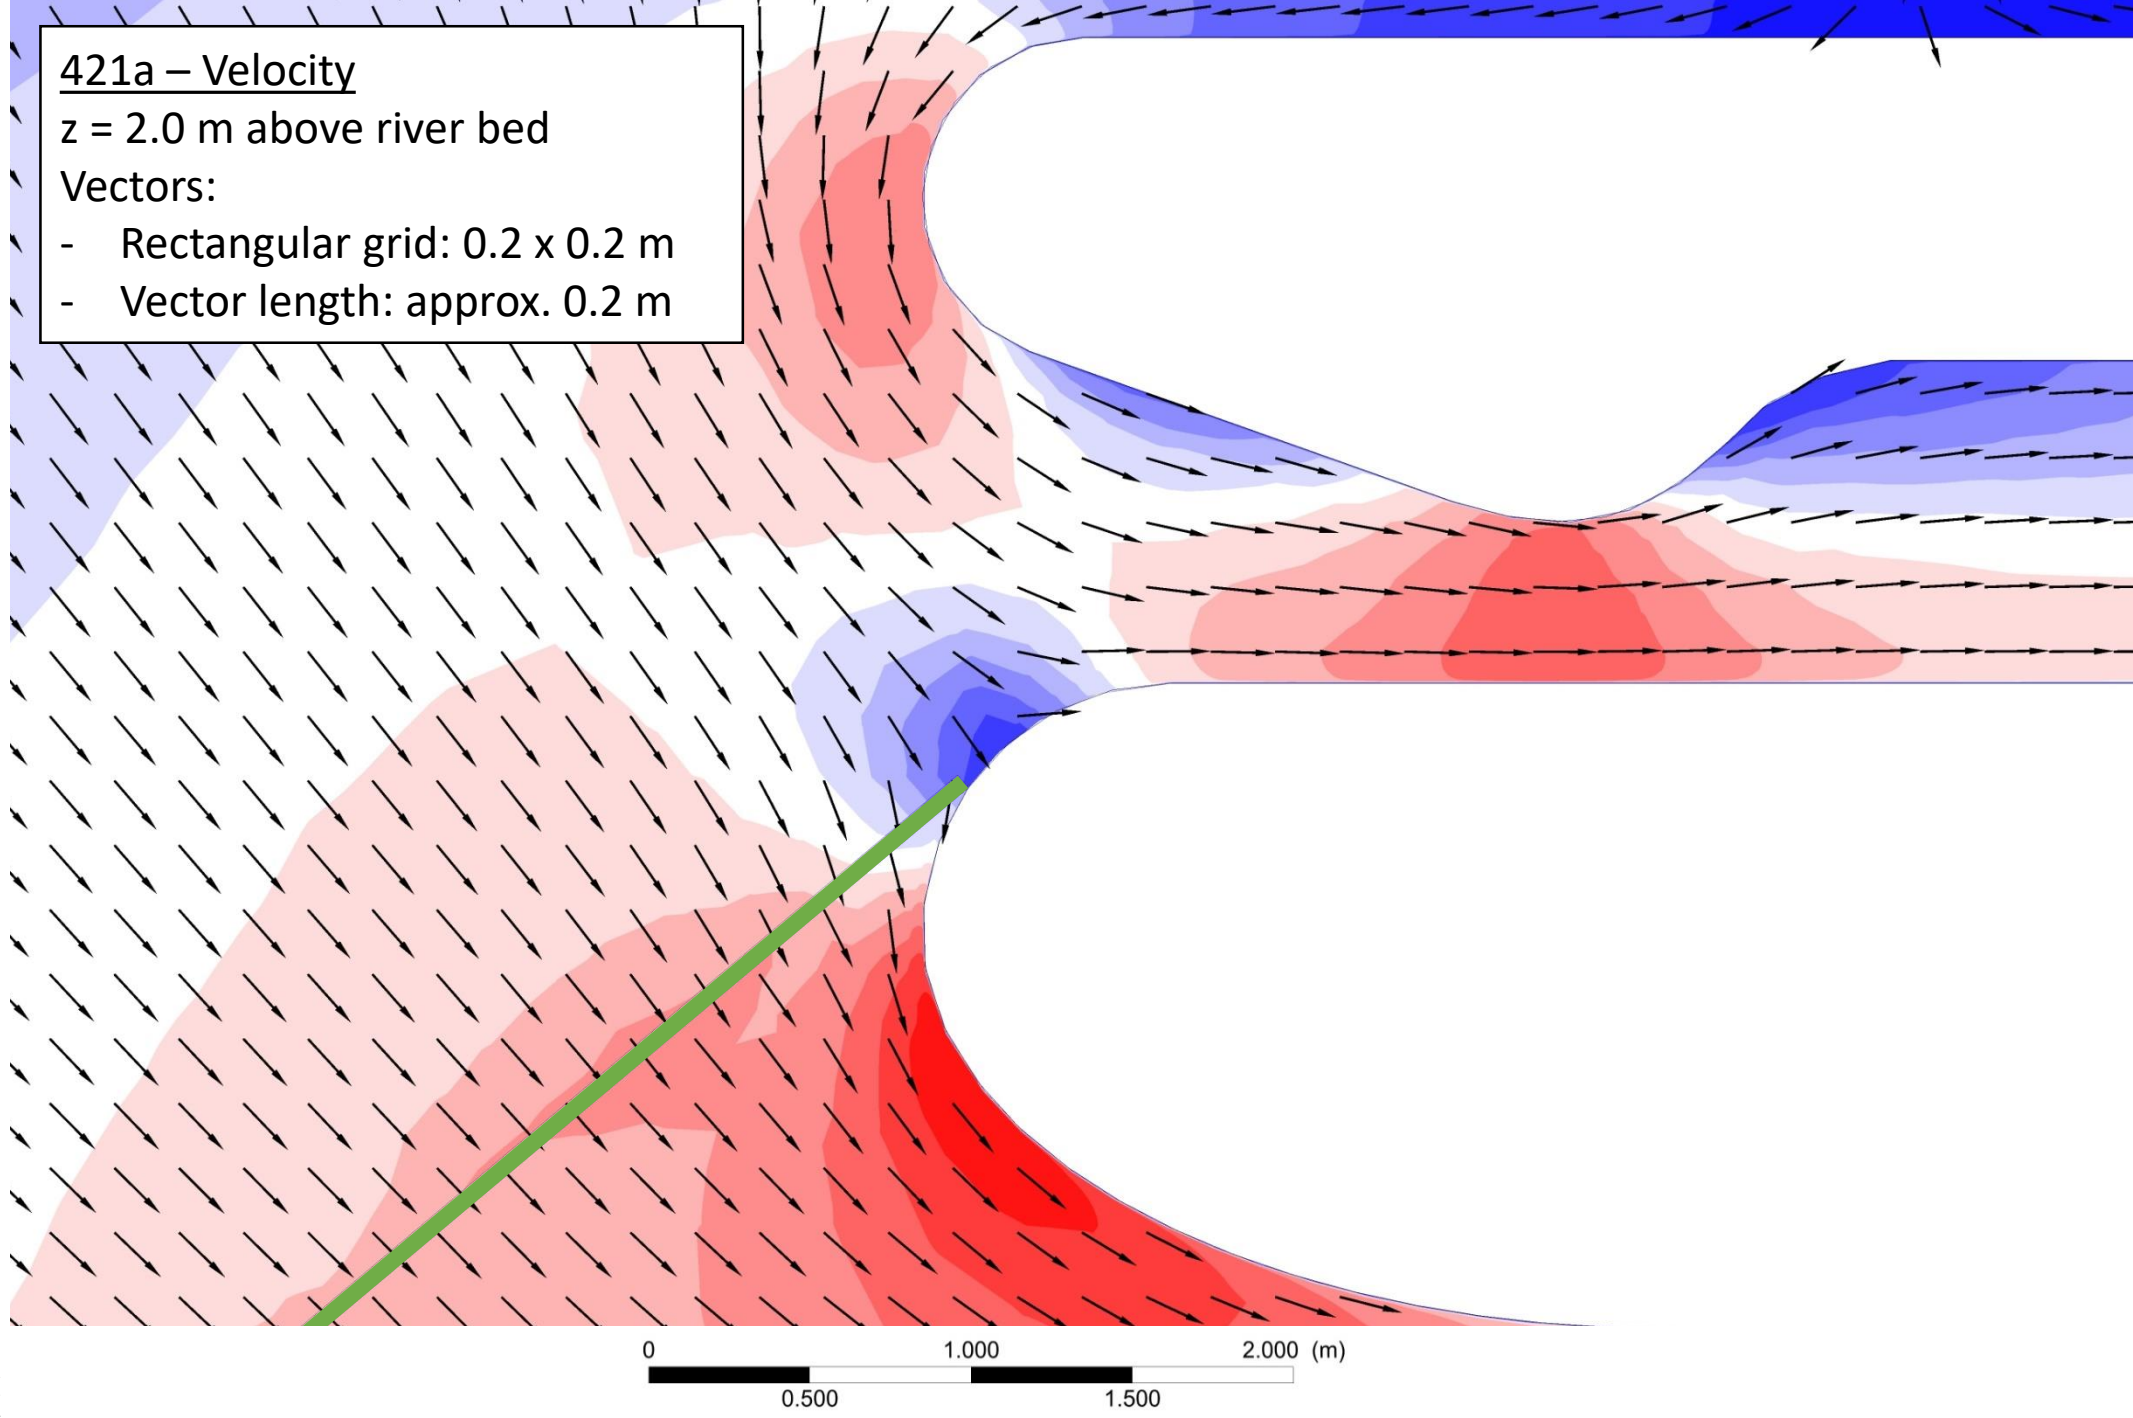



Velocity  
1.3  
1.2  
1.1  
1.0  
0.9  
0.8  
0.7  
0.6  
0.5  
0.4  
0.3  
0.2  
0.1  
0.0  
[m s<sup>-1</sup>]

421a – Velocity

z = 3.5 m above river bed

Vectors:

- Rectangular grid: 0.2 x 0.2 m
- Vector length: approx. 0.2 m

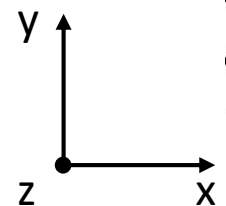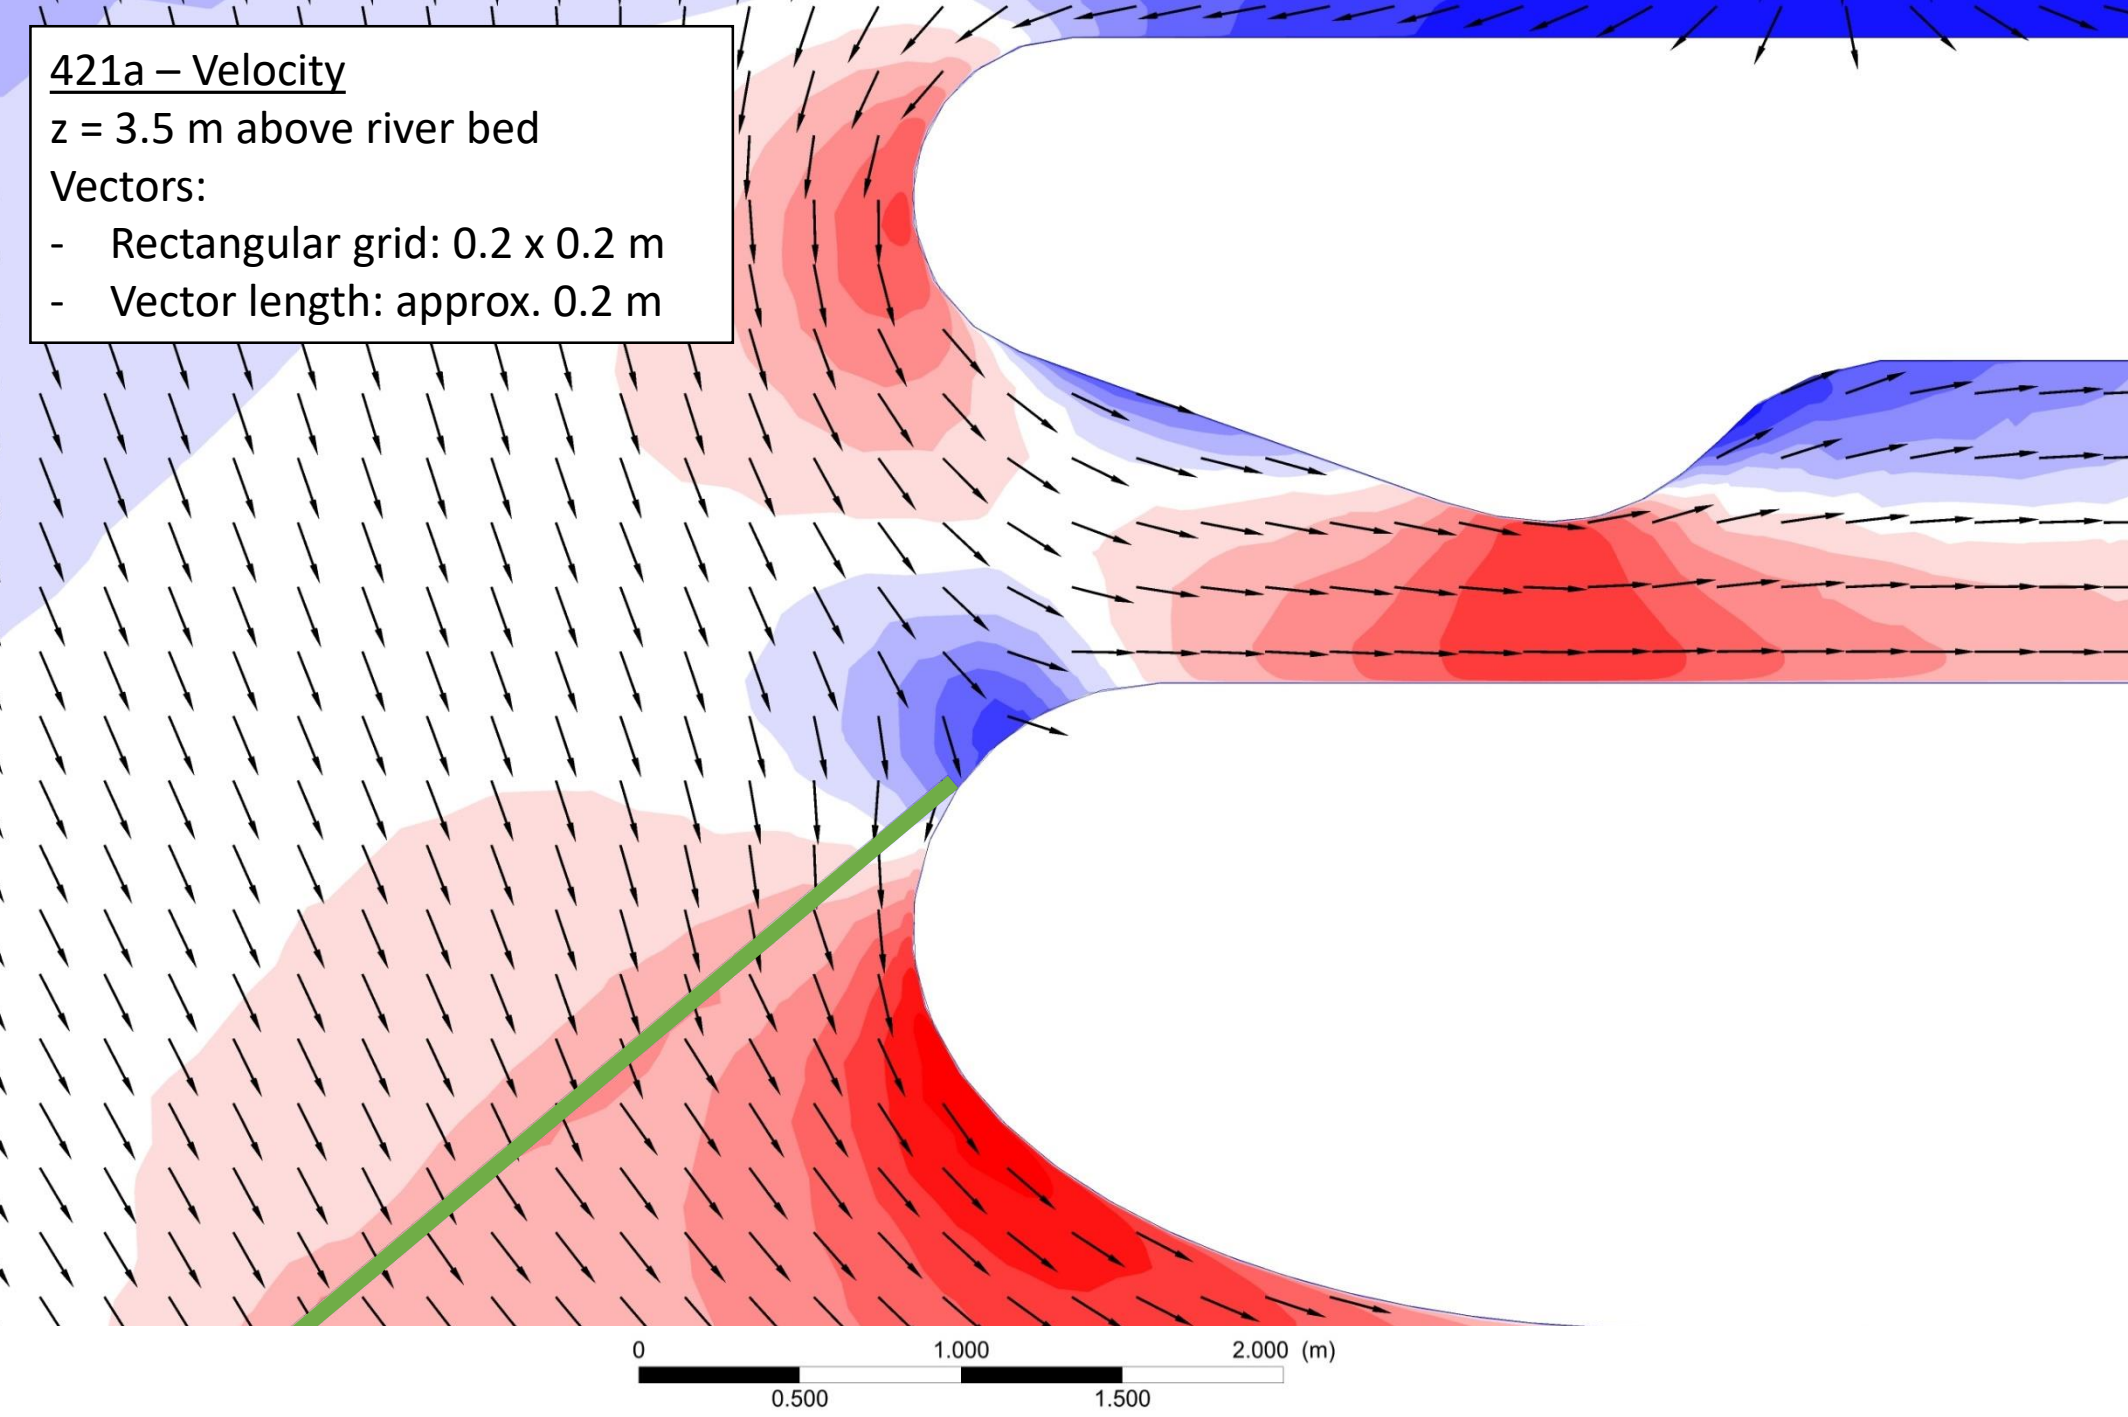

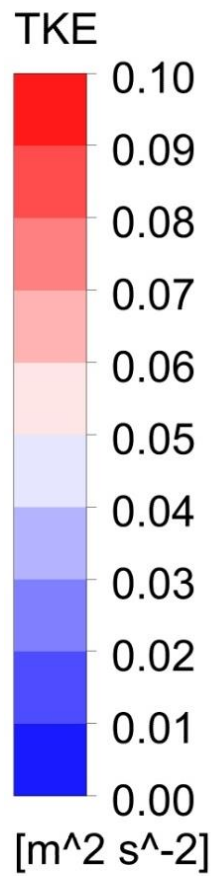

421a – Turbulence Kinetic Energy  
z = 0.1 m above river bed

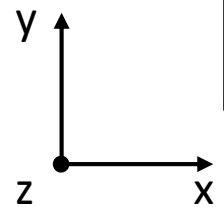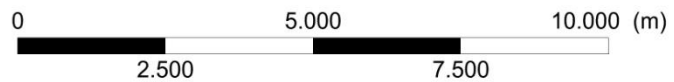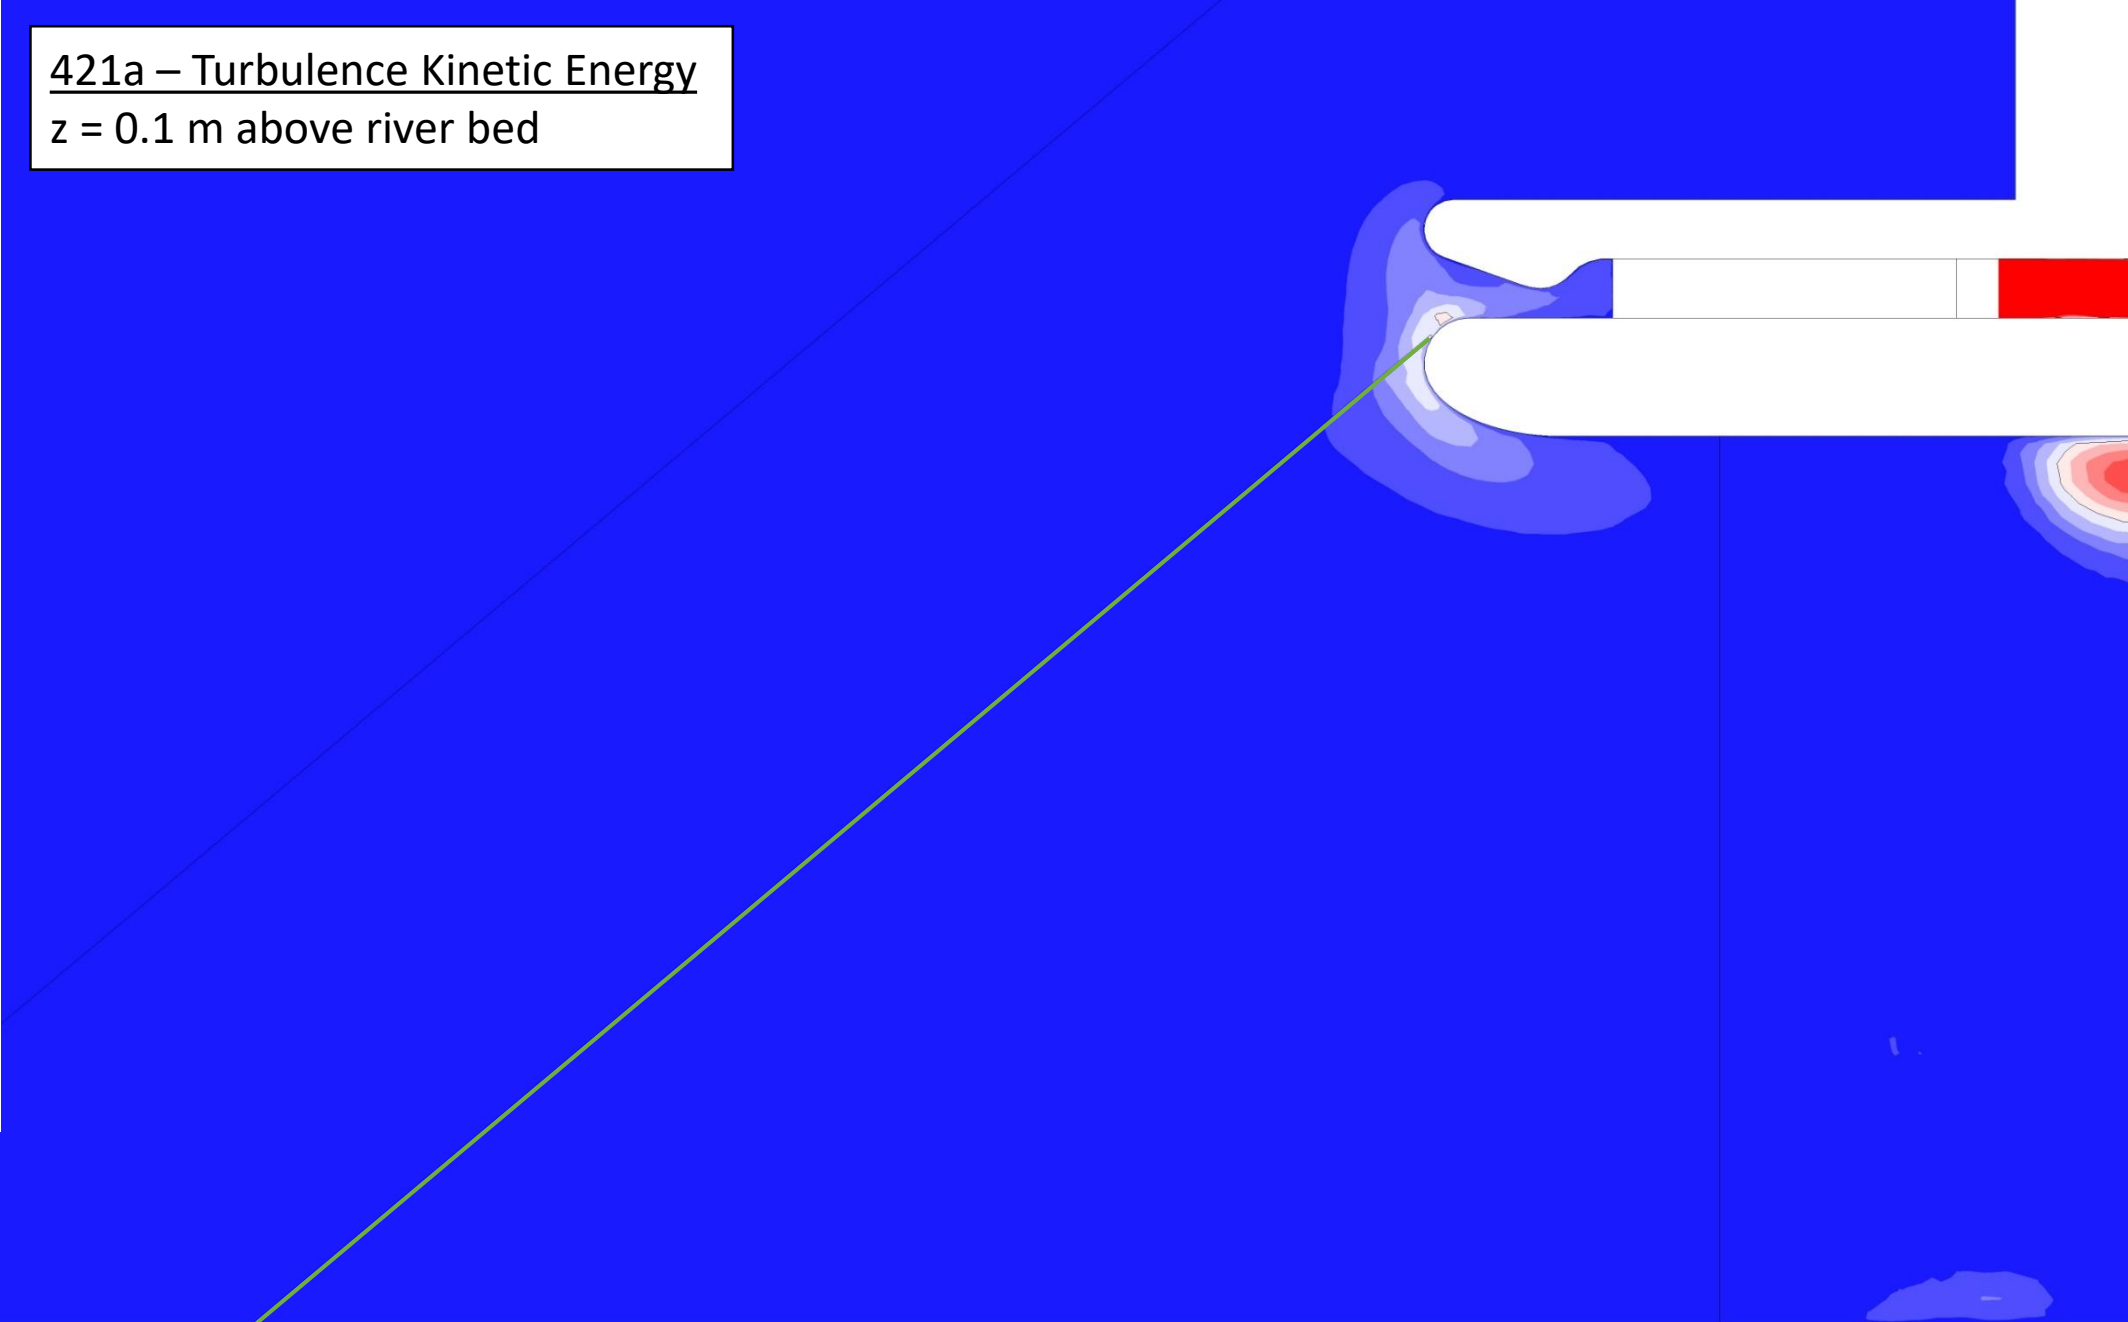

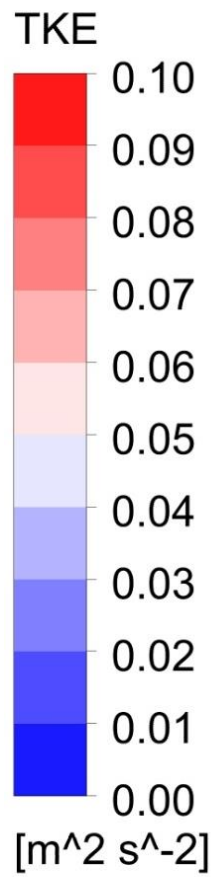

421a – Turbulence Kinetic Energy  
z = 2.0 m above river bed

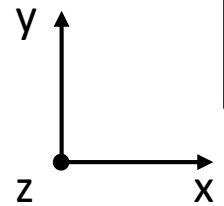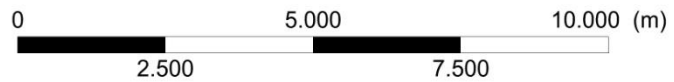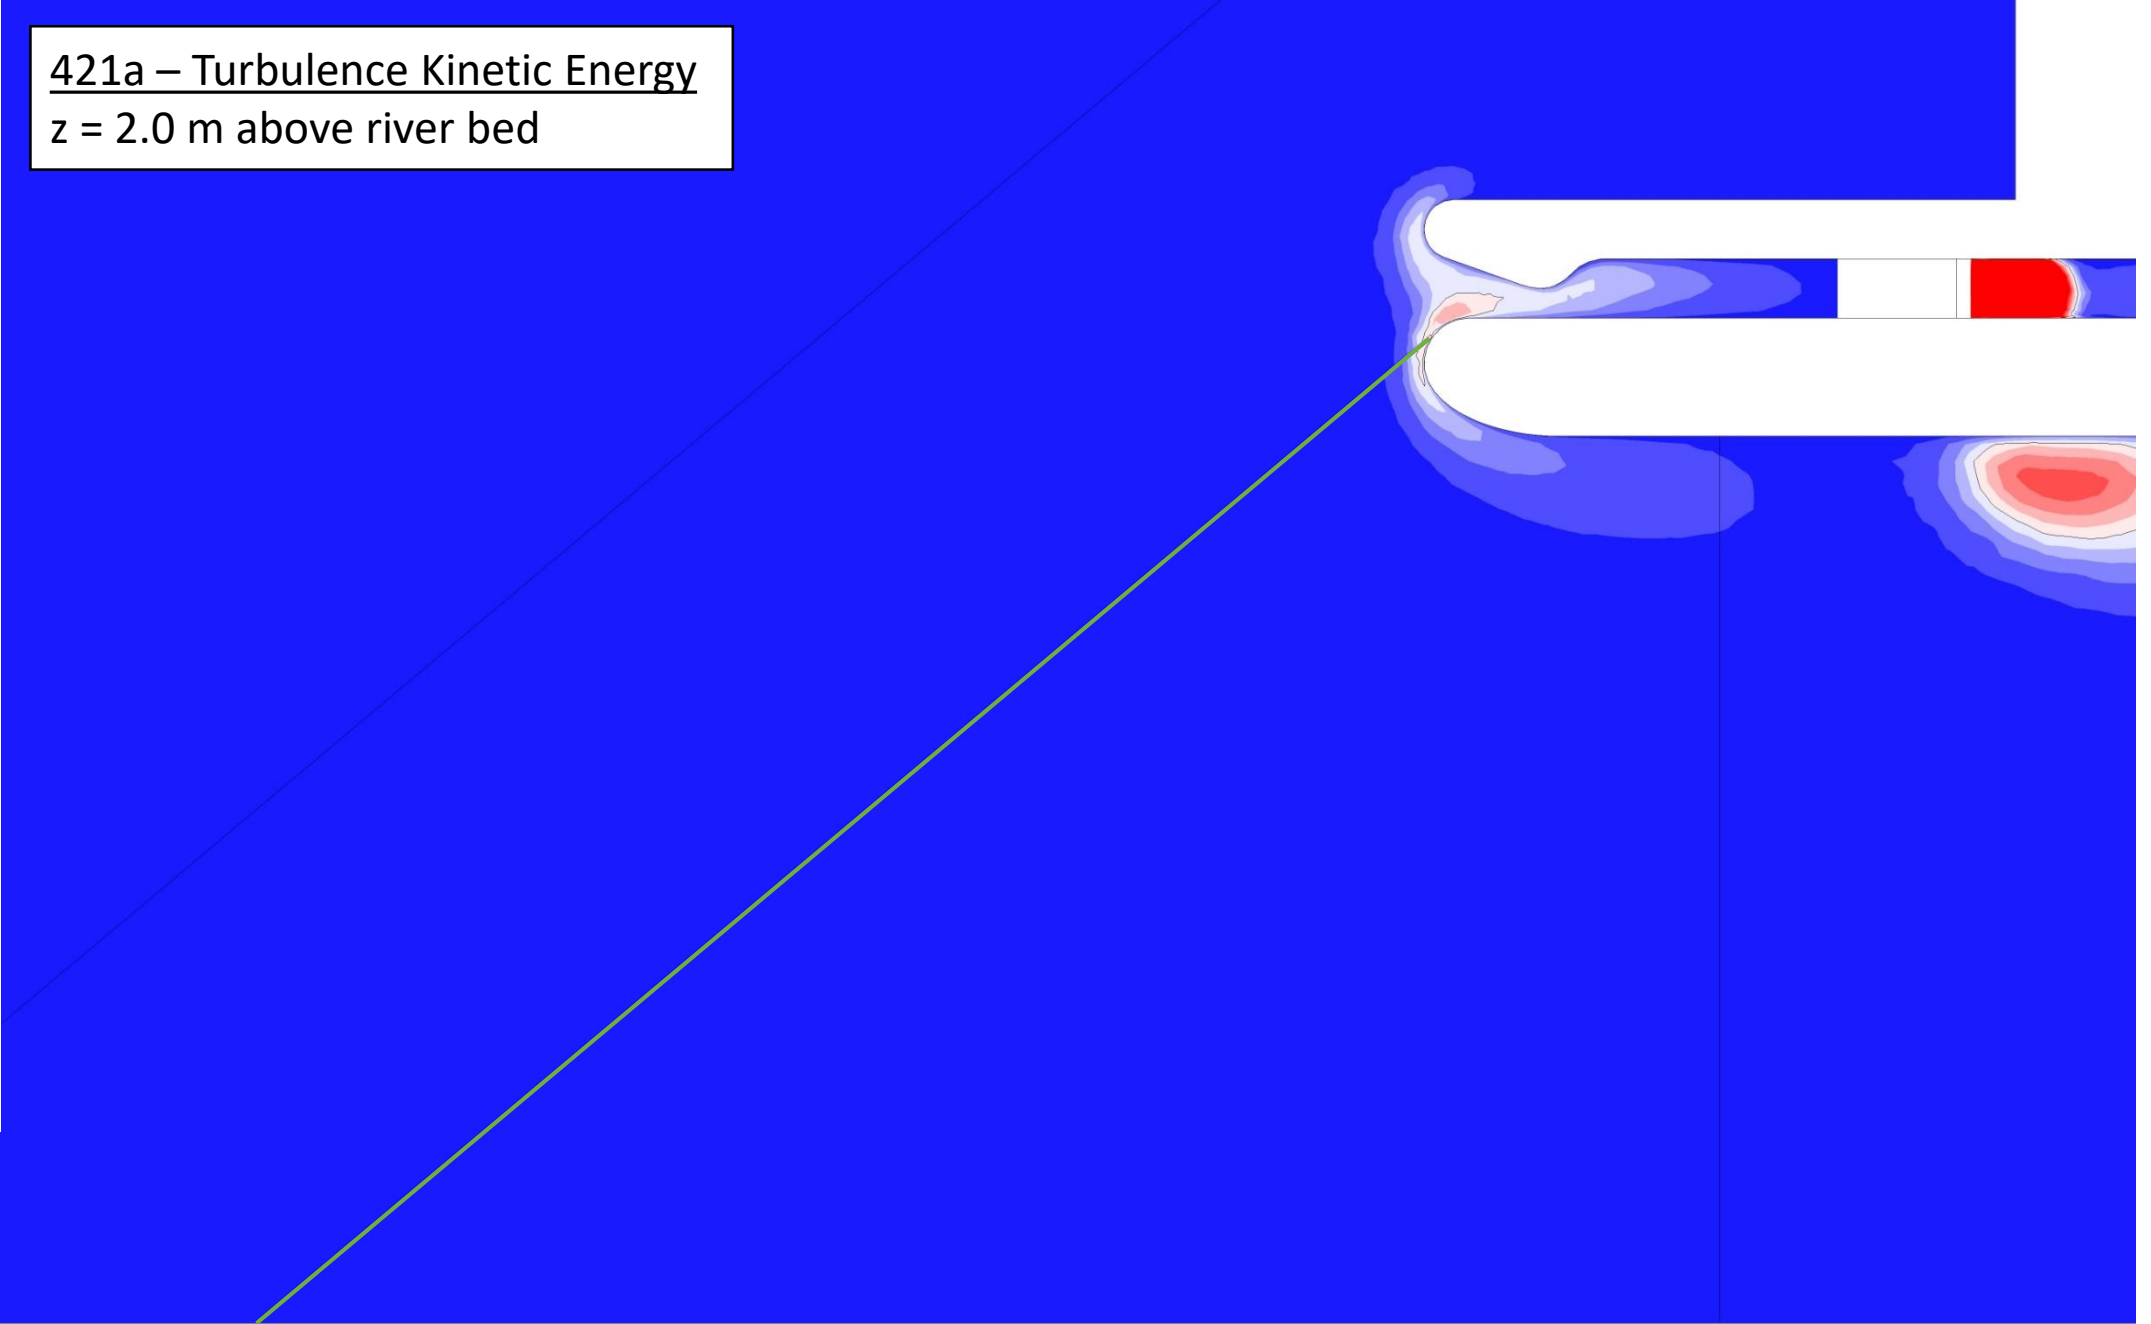



421a – Turbulence Kinetic Energy  
z = 3.5 m above river bed

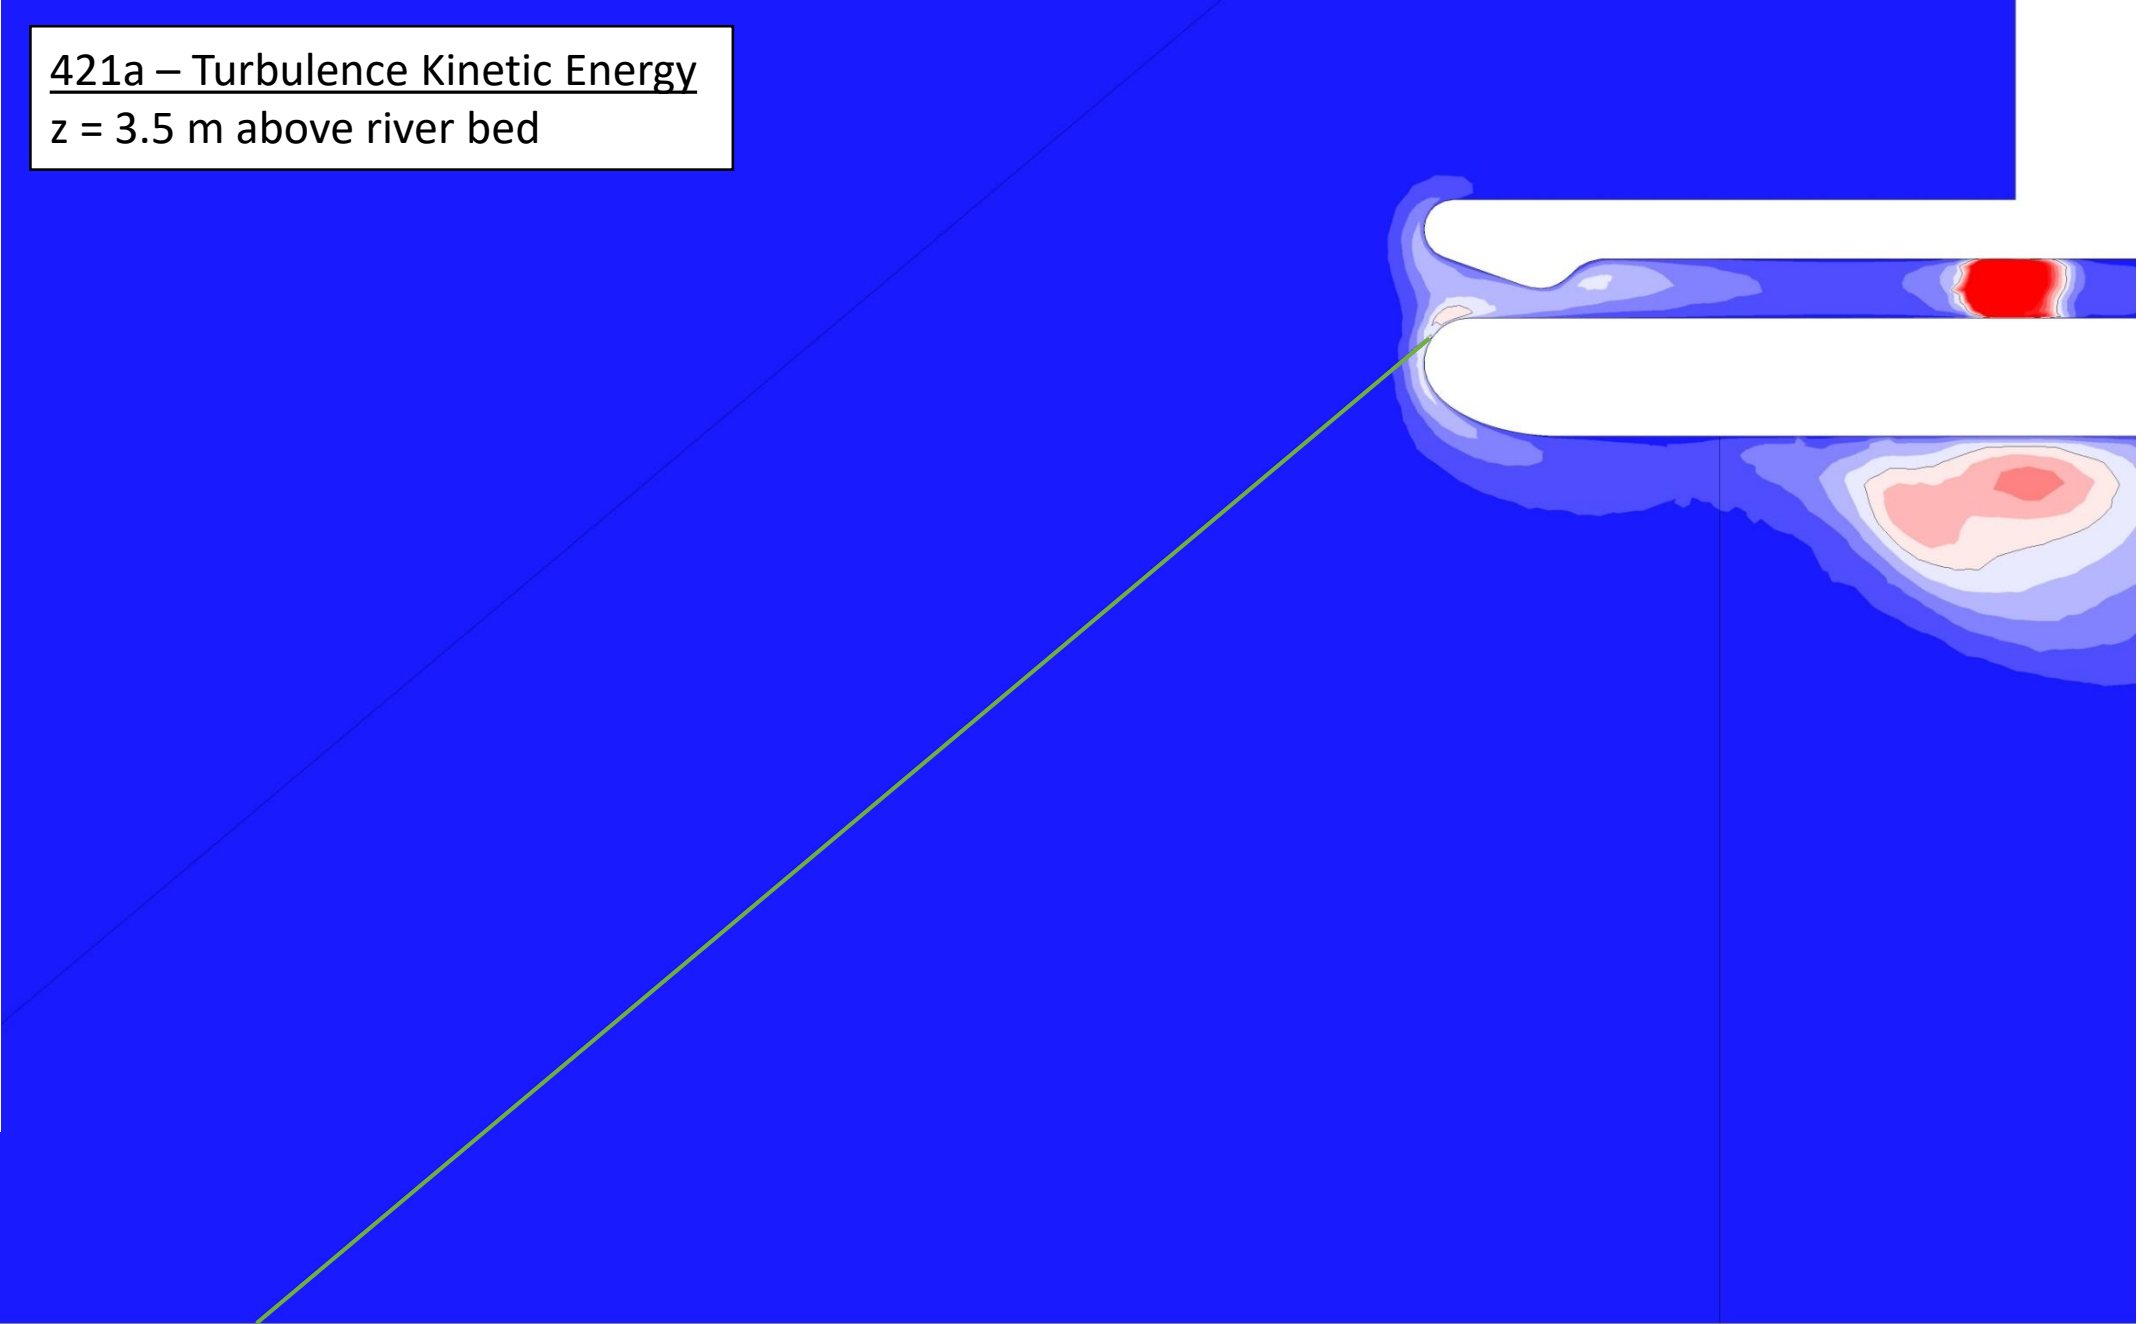





421a – Turbulence Kinetic Energy  
z = 0.1 m above river bed

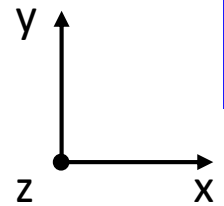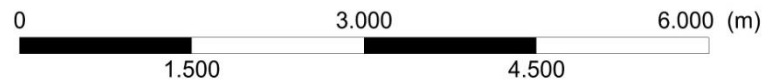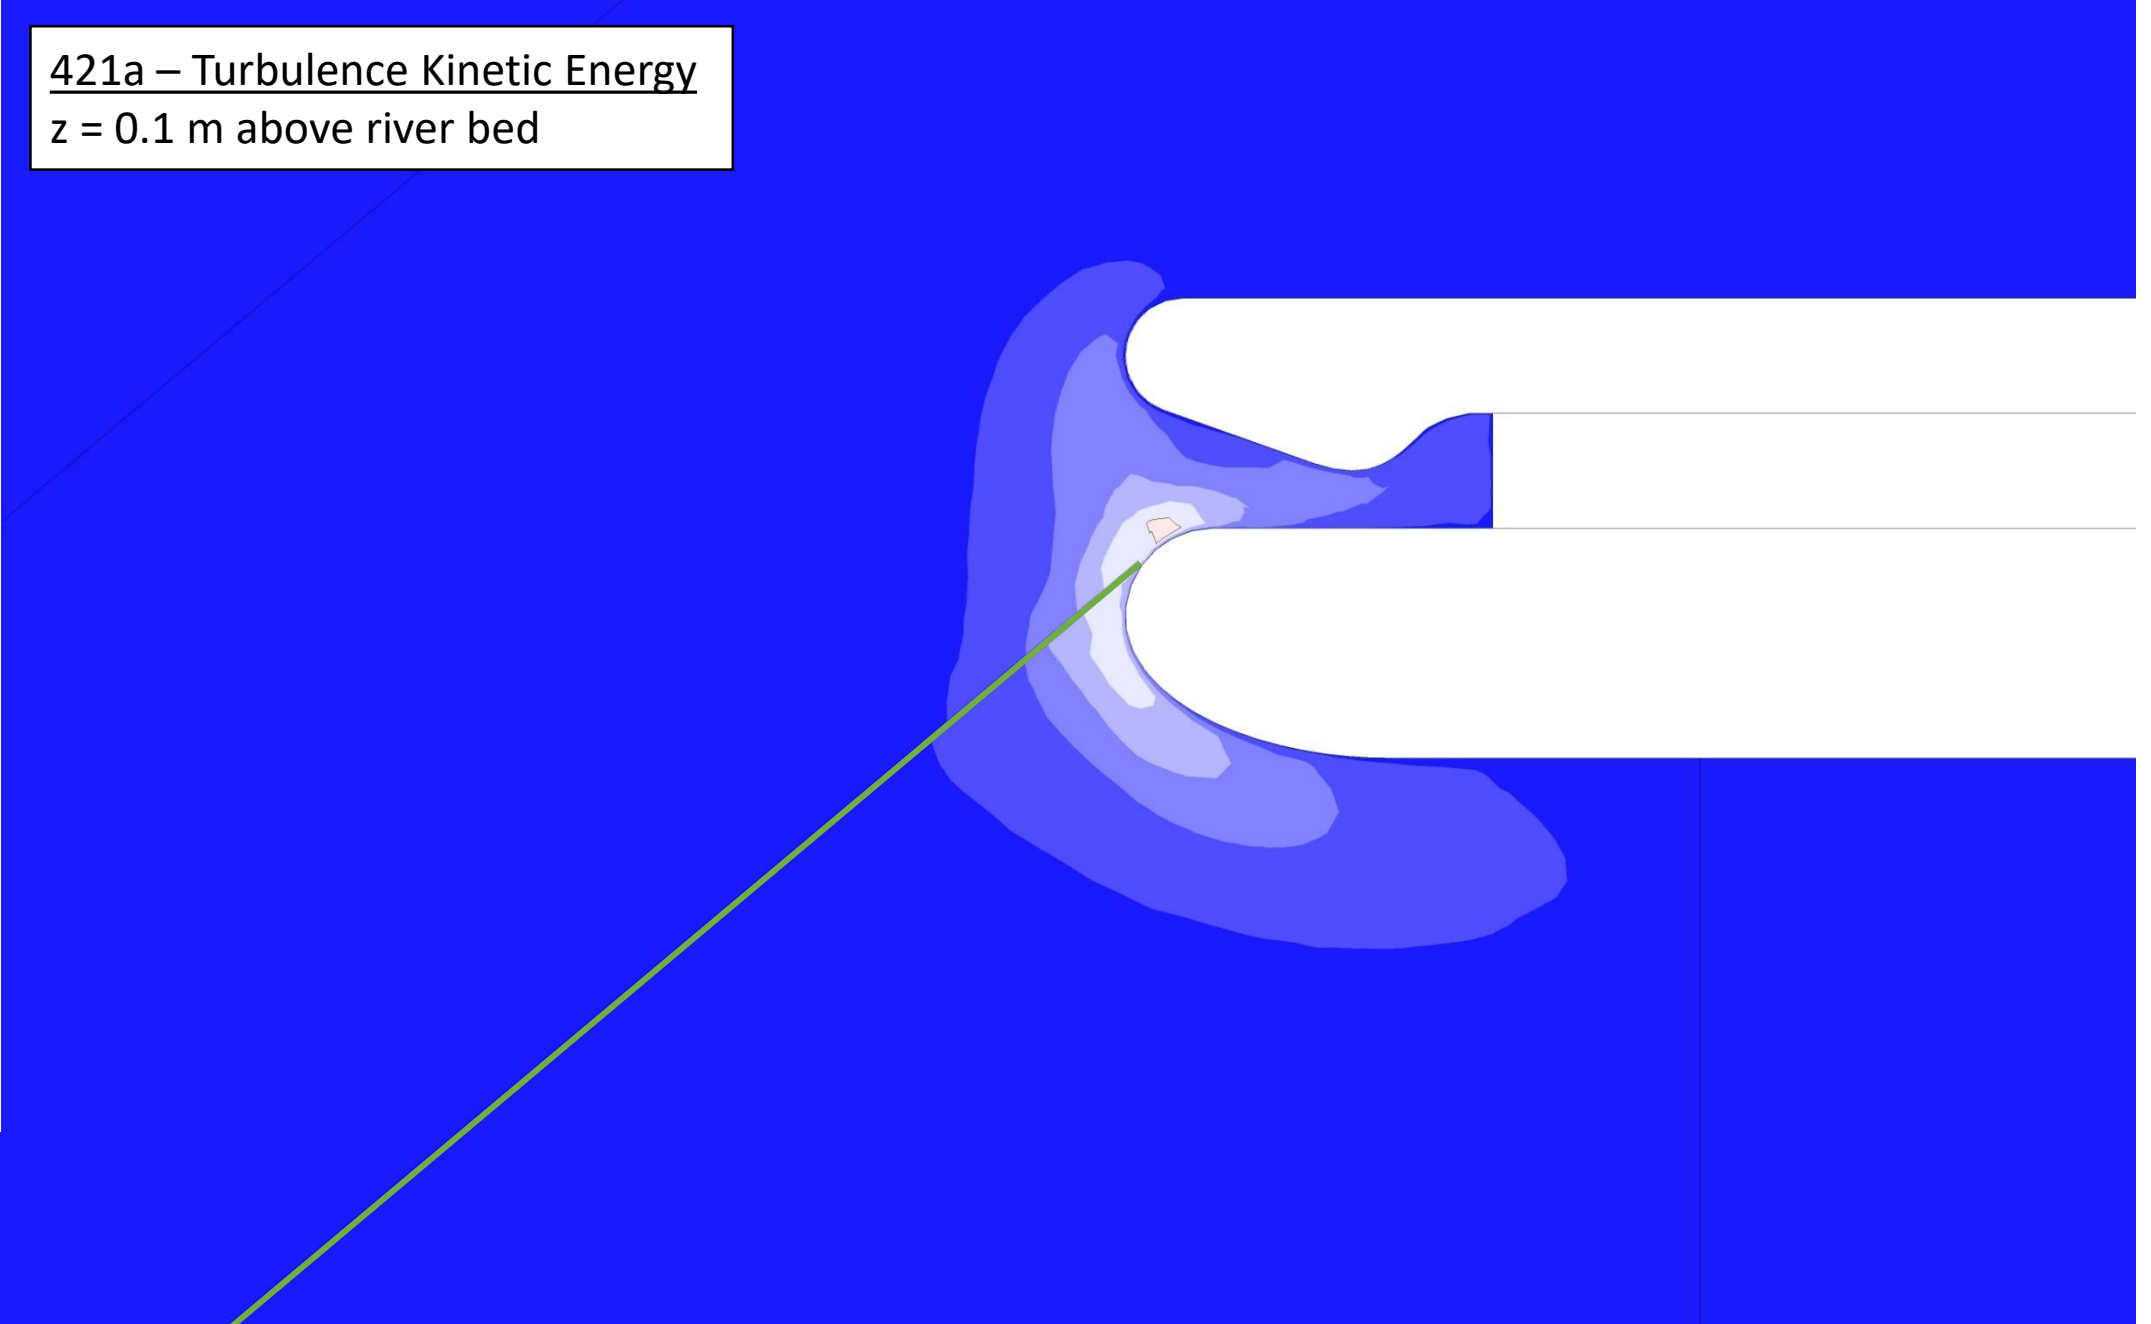



421a – Turbulence Kinetic Energy  
z = 2.0 m above river bed

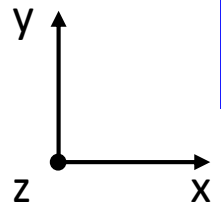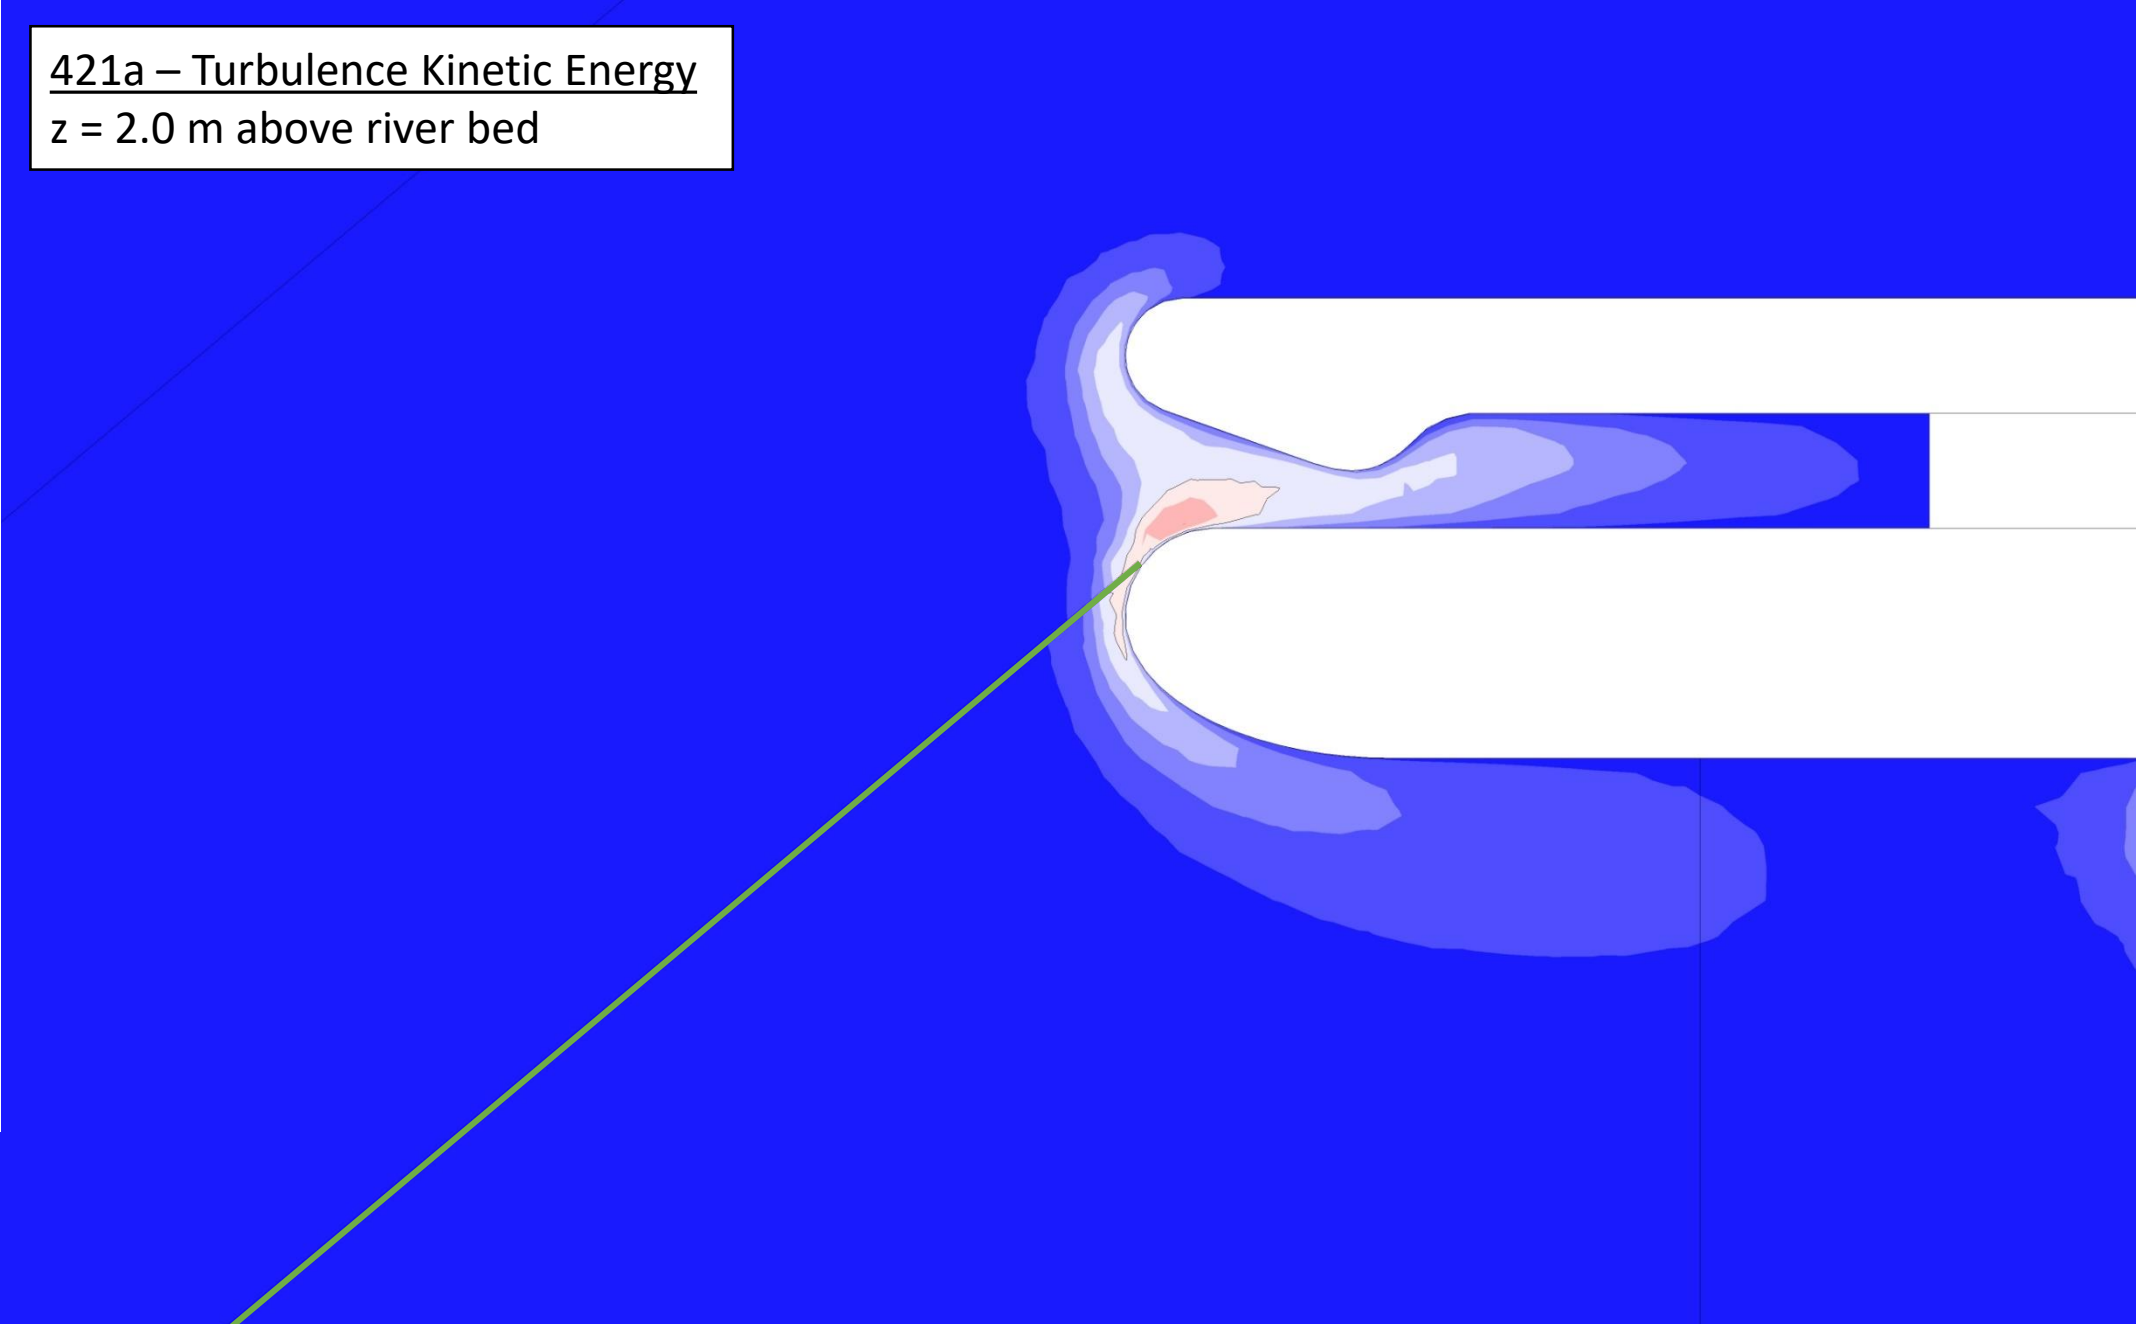



421a – Turbulence Kinetic Energy  
z = 3.5 m above river bed

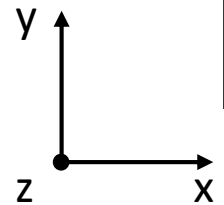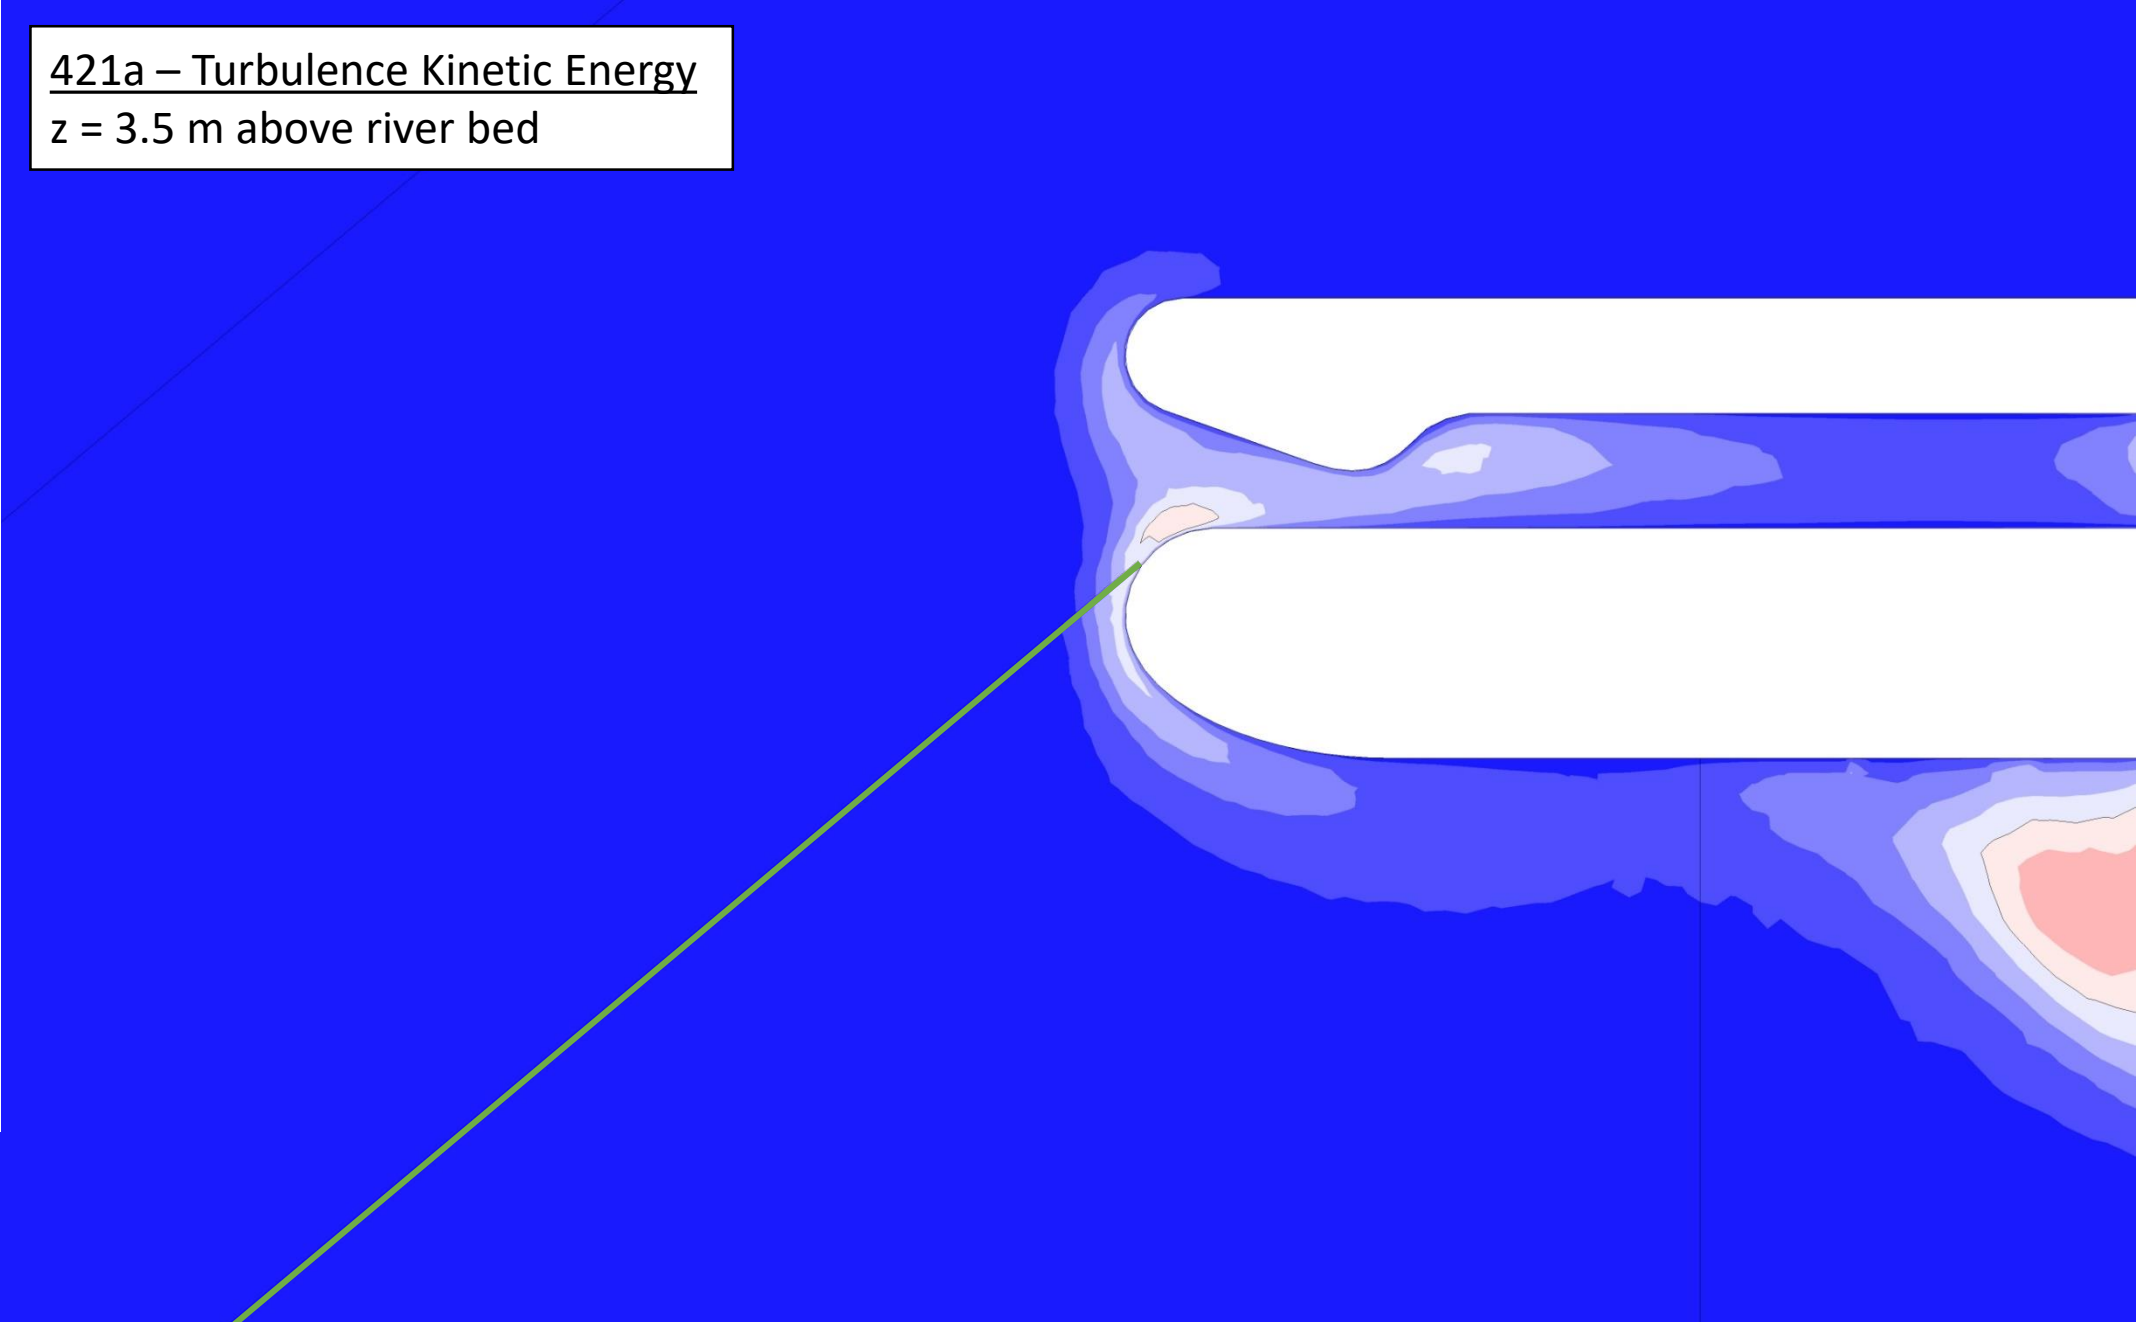

SVG

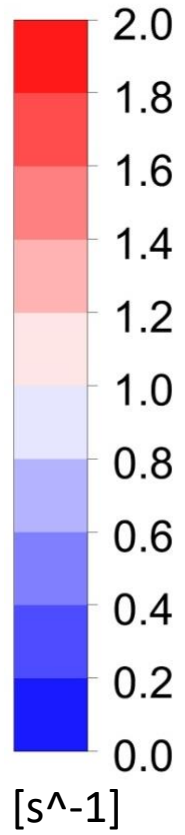

421a – Spatial Velocity Gradient  
z = 0.1 m above river bed

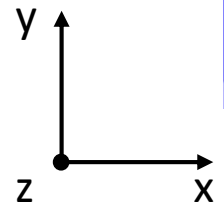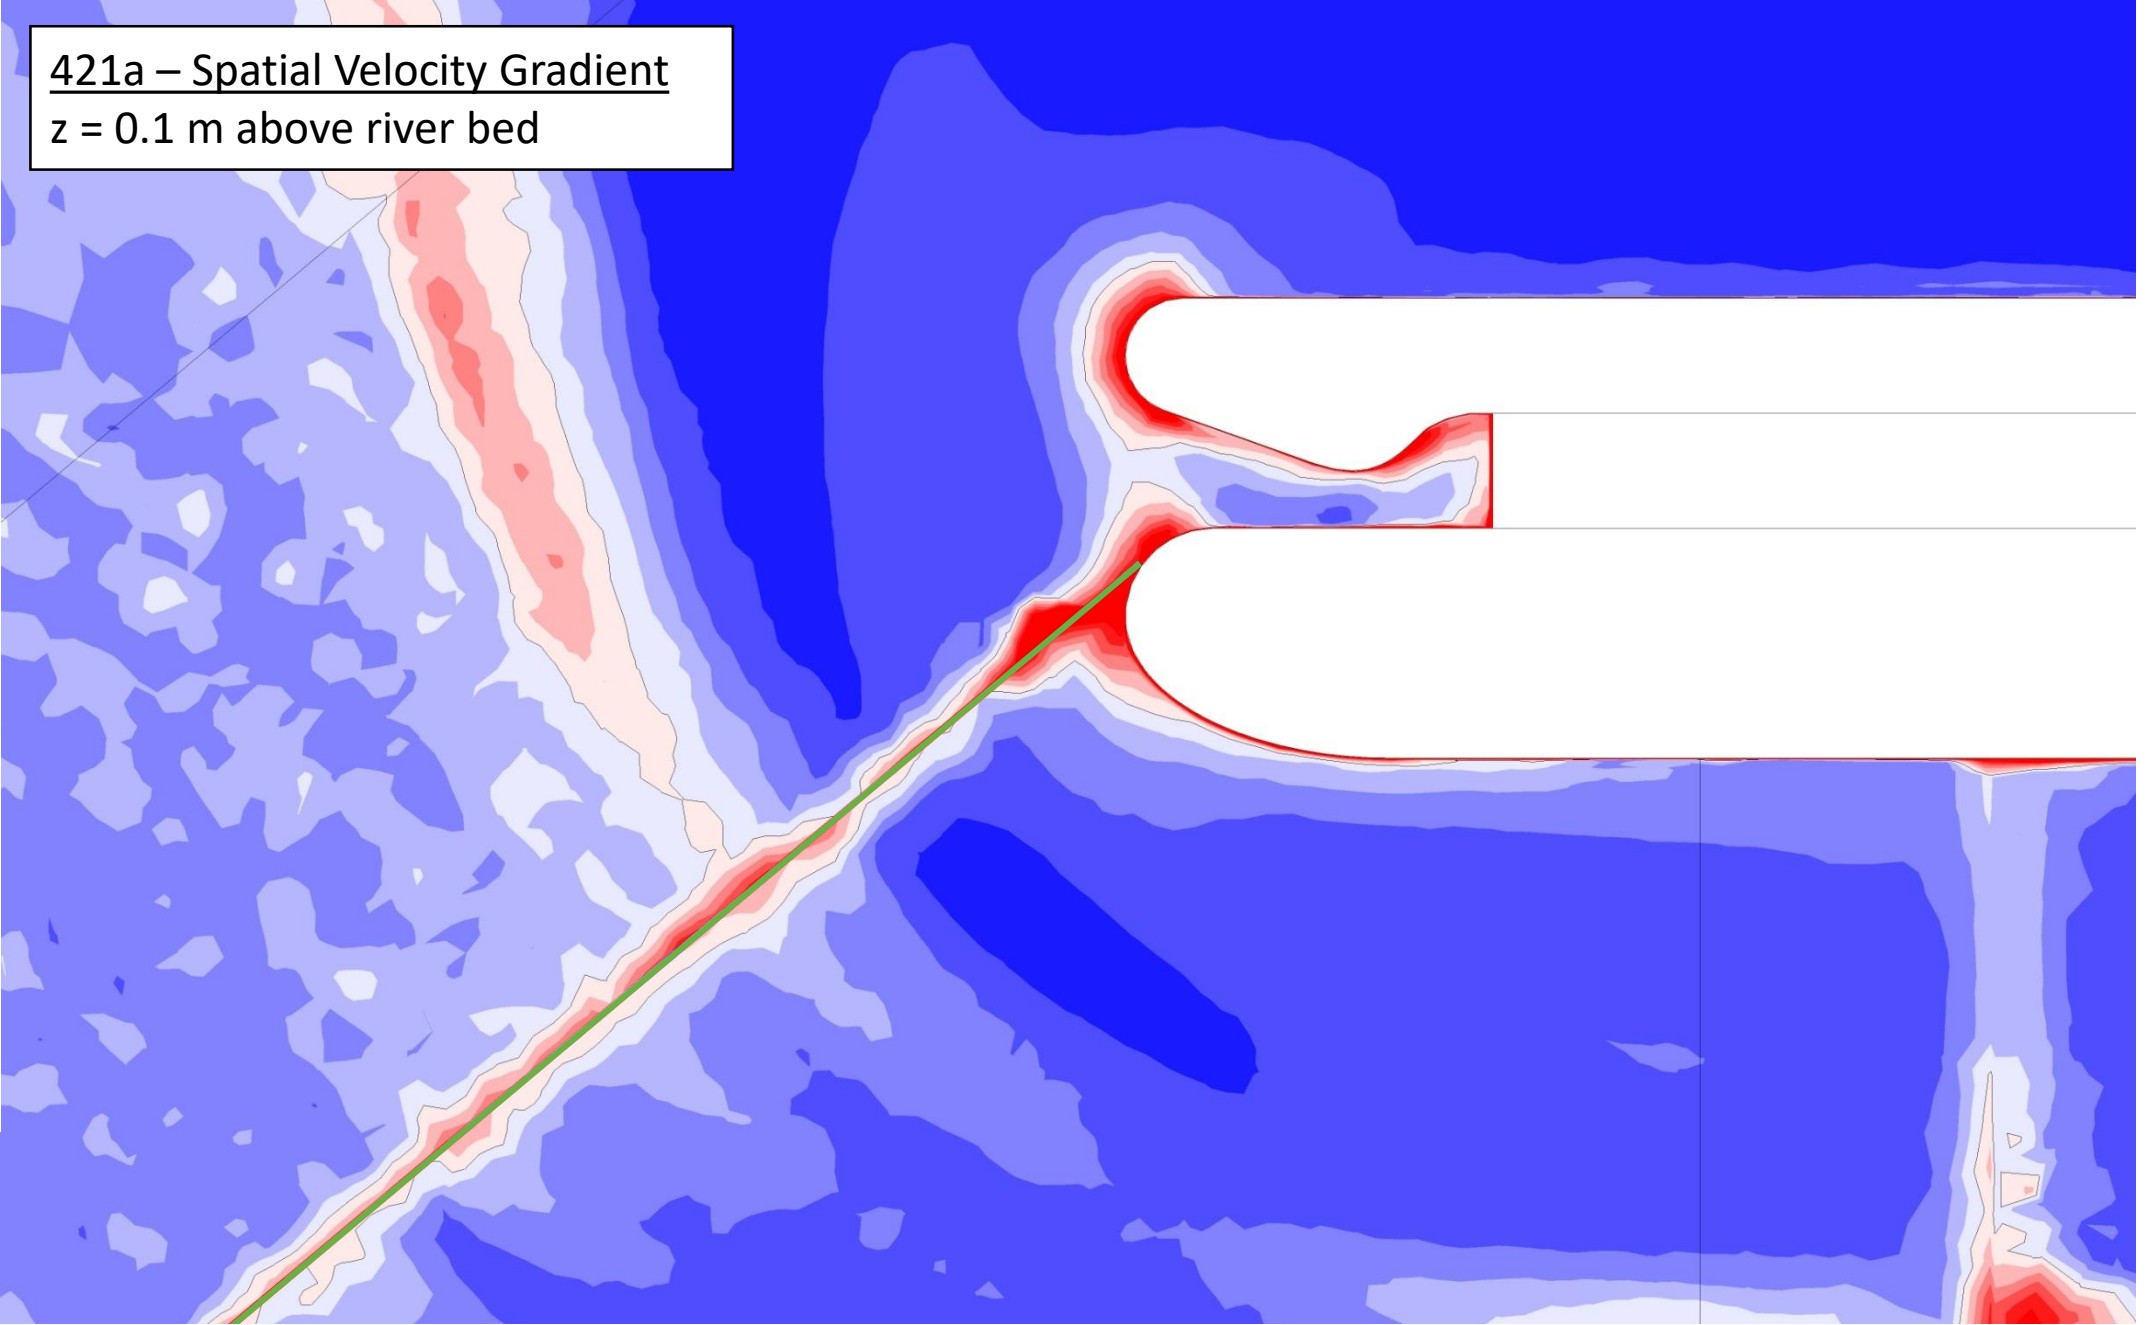



SVG

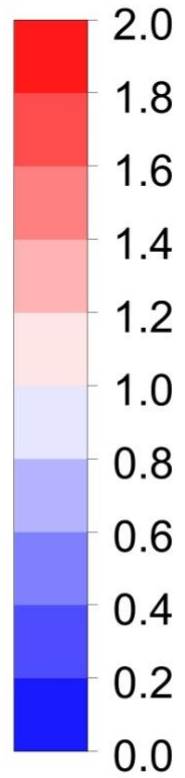

[s<sup>-1</sup>]

421a – Spatial Velocity Gradient  
z = 2.0 m above river bed

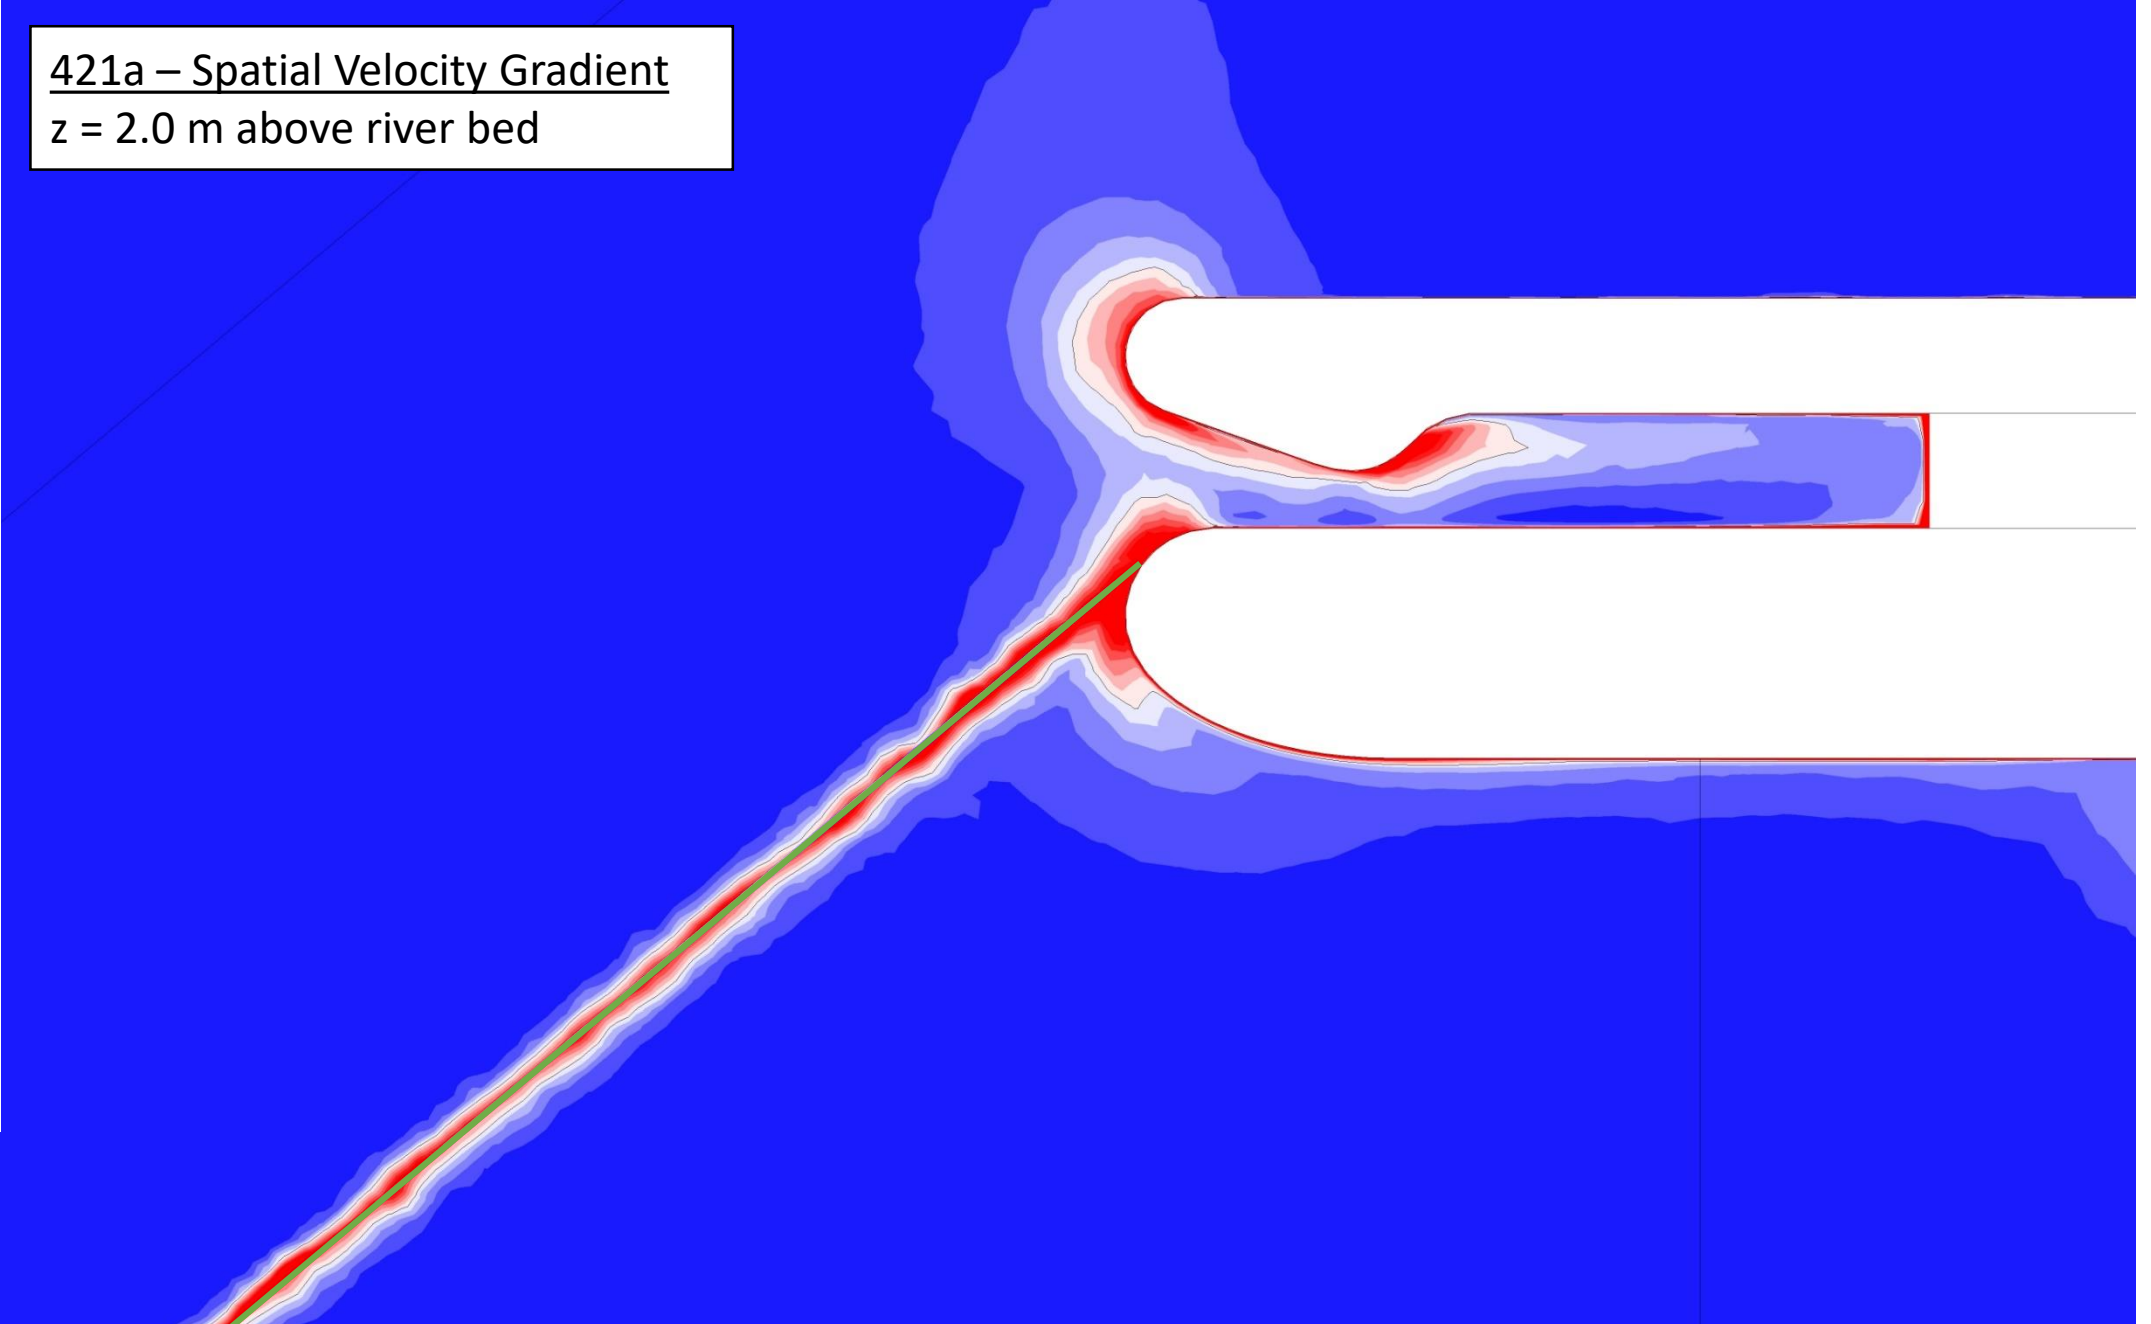

SVG



[s<sup>-1</sup>]

421a – Spatial Velocity Gradient  
z = 3.5 m above river bed

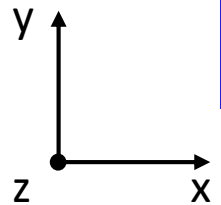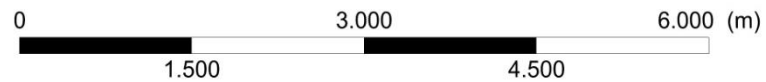

Velocity  
1.3  
1.2  
1.1  
1.0  
0.9  
0.8  
0.7  
0.6  
0.5  
0.4  
0.3  
0.2  
0.1  
0.0  
[m s<sup>-1</sup>]

421a – Velocity ( $v_a$ )  
Plane 0.1 m in front of FGS

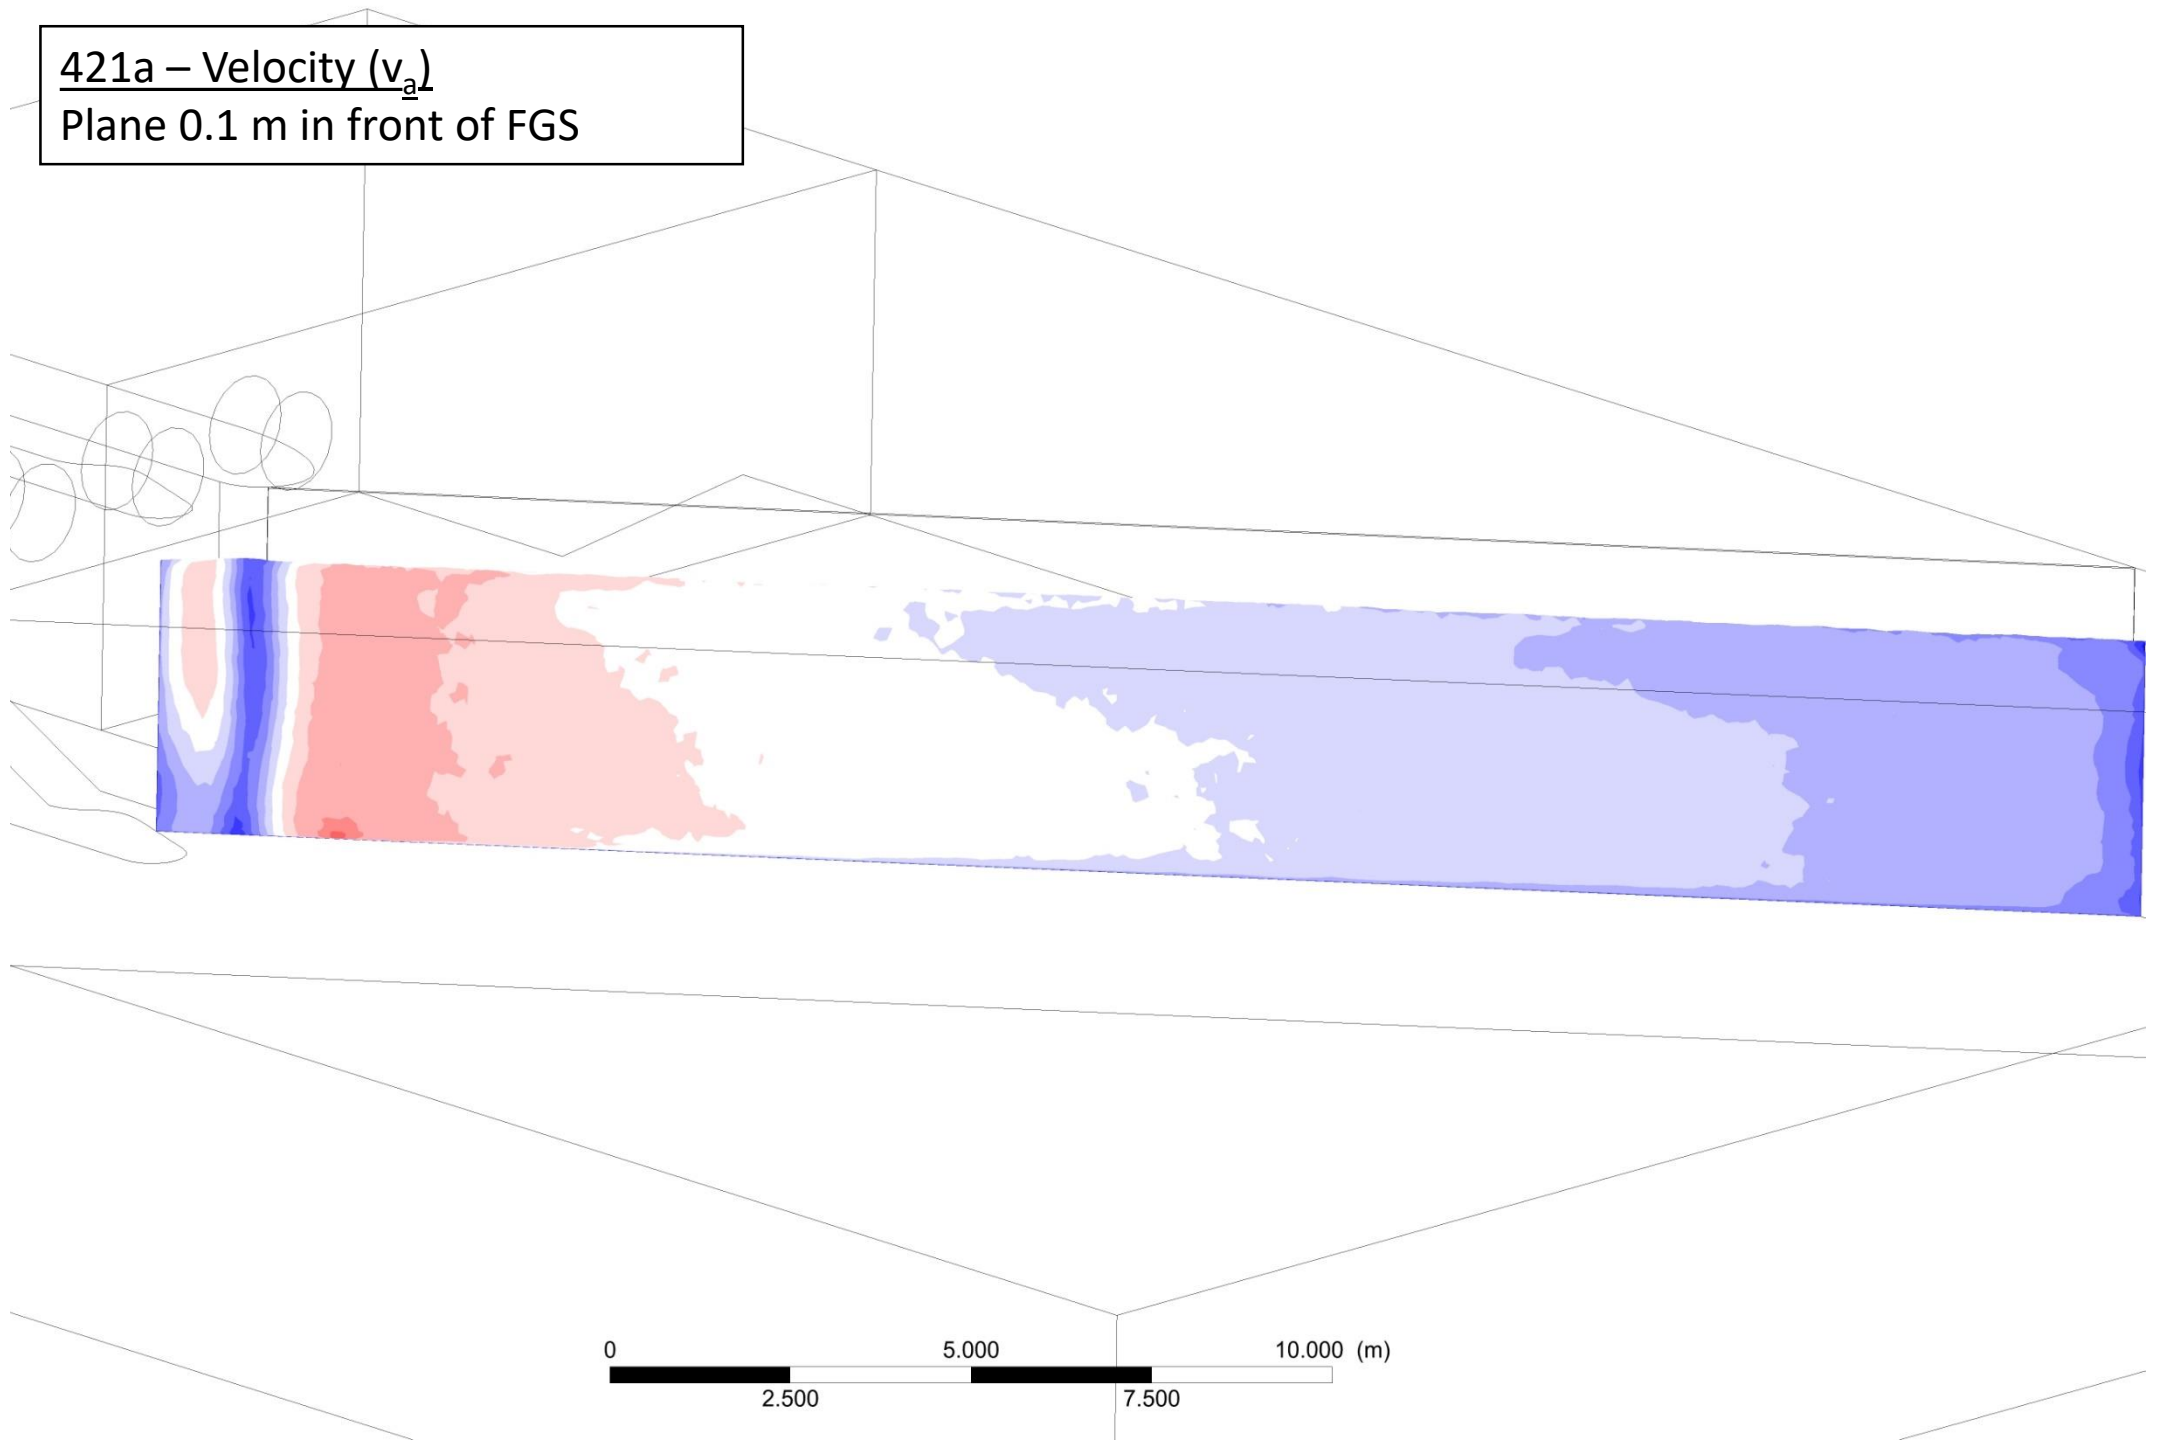

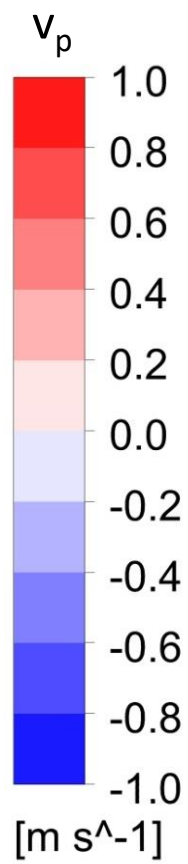

421a – Velocity ( $v_p$ )  
Plane 0.1 m in front of FGS

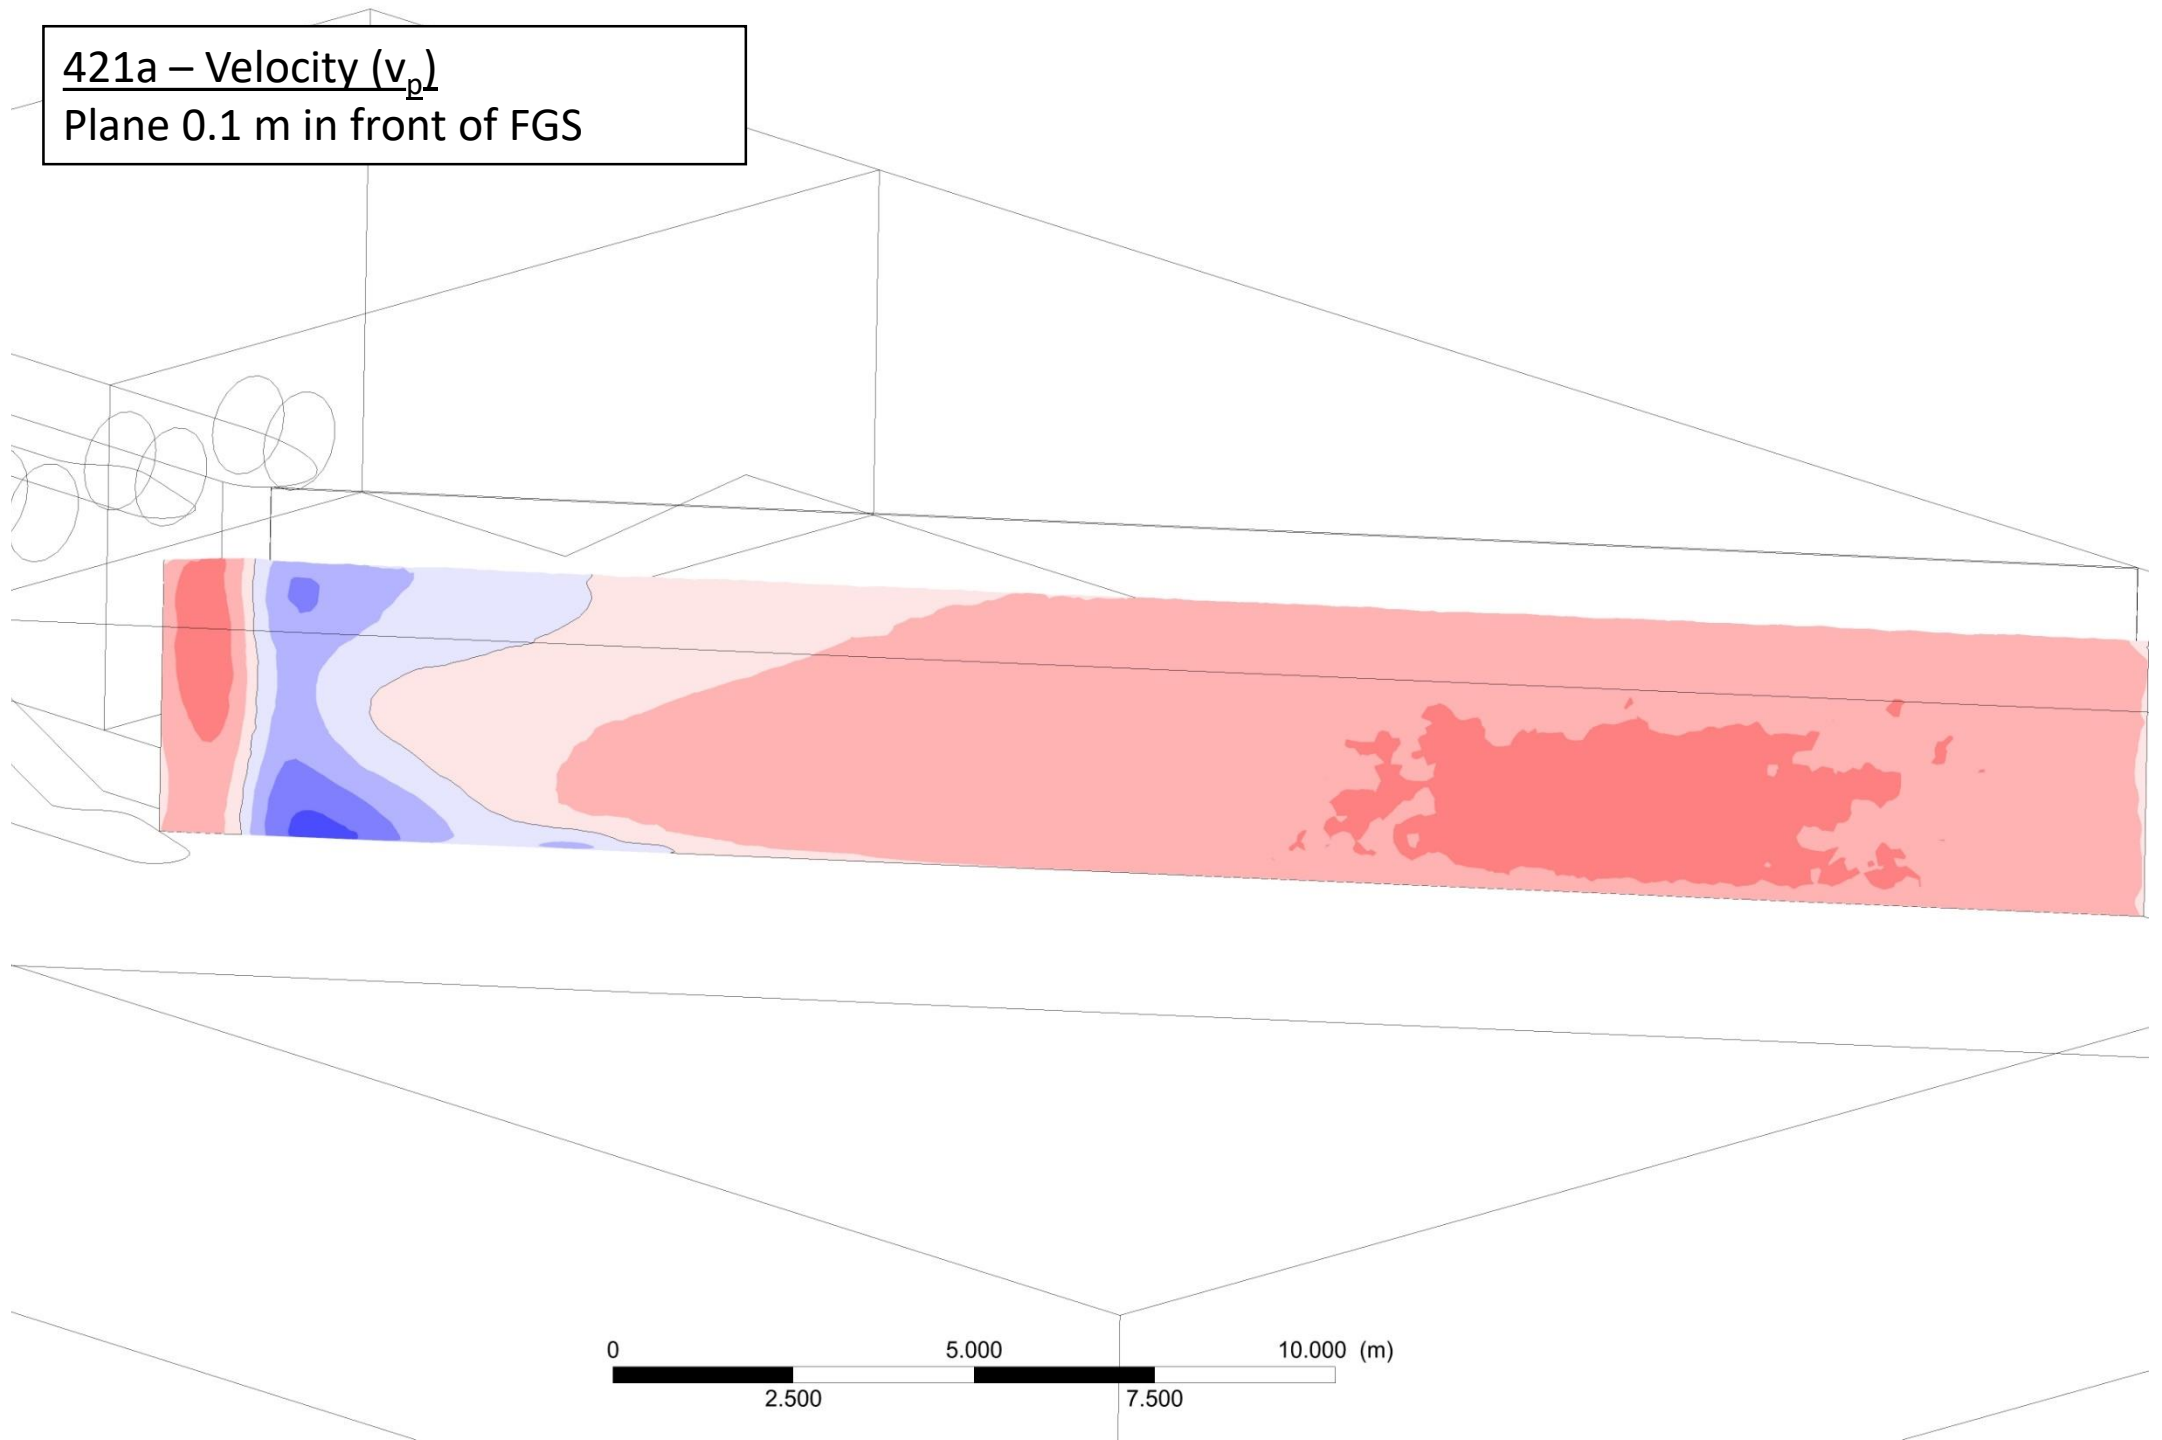



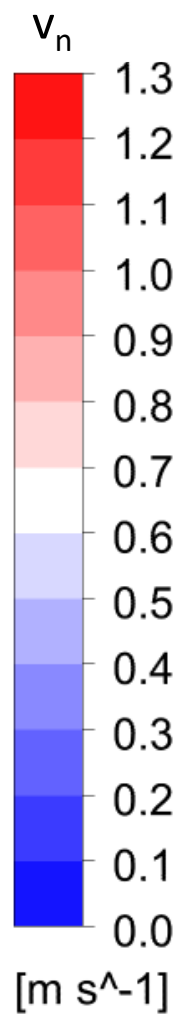

421a – Velocity ( $v_n$ )  
Plane 0.1 m in front of FGS

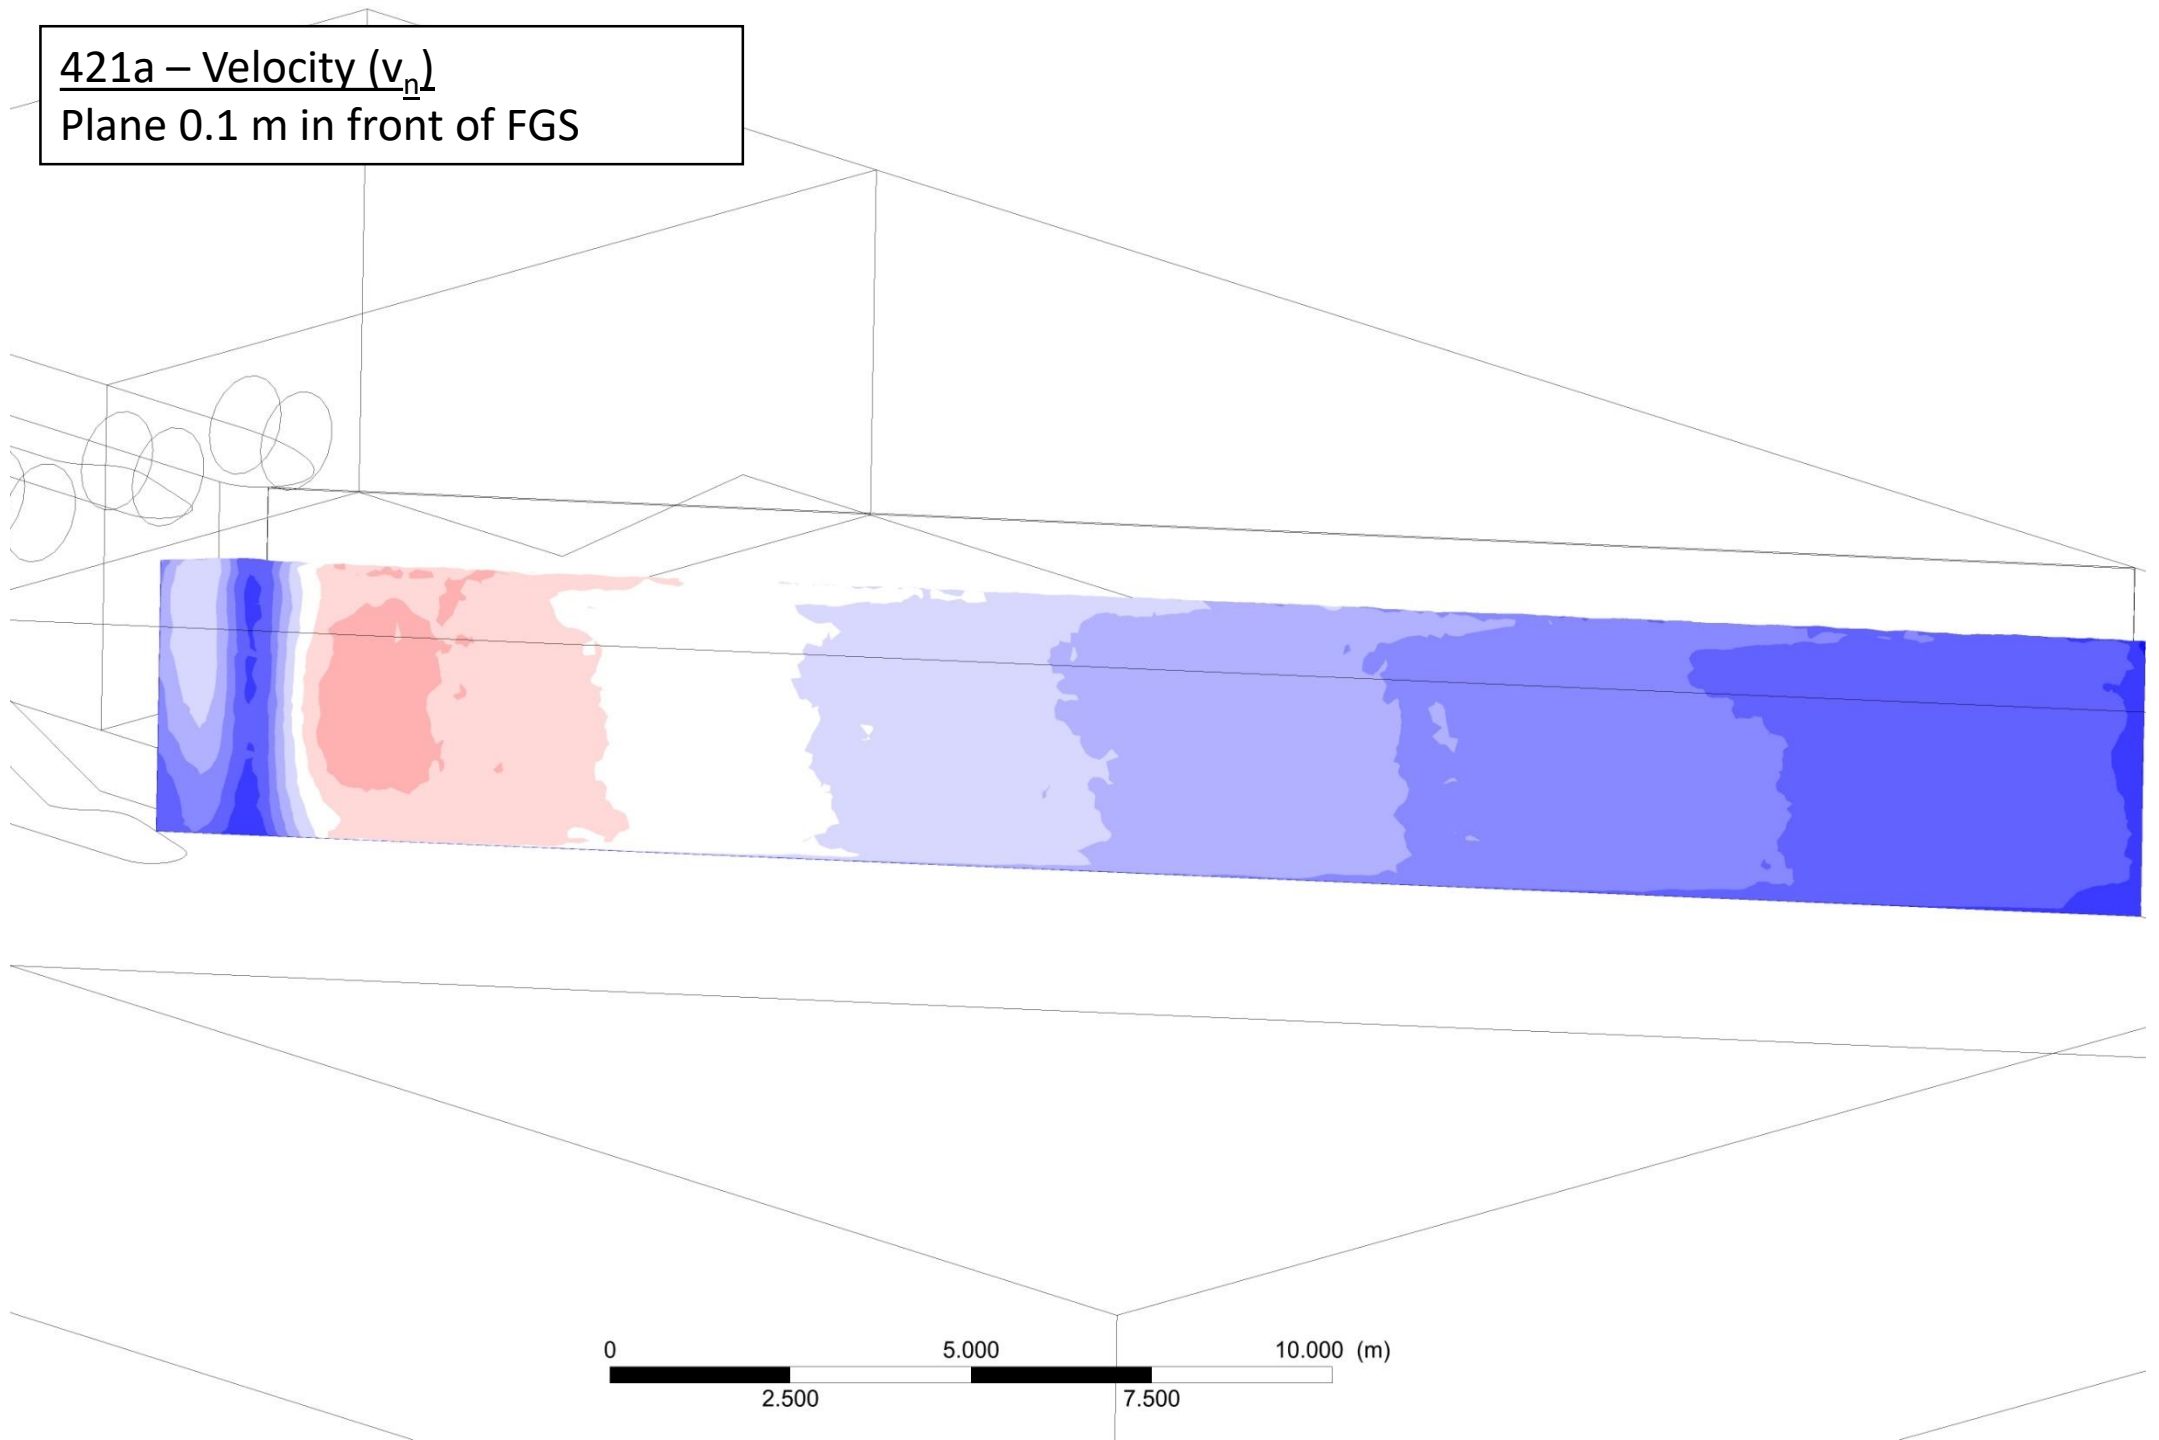

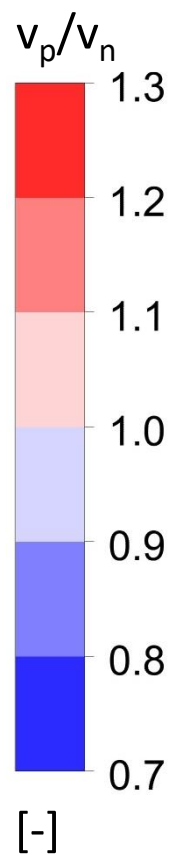

421a – Velocity ratio ( $v_p/v_n$ )  
Plane 0.1 m in front of FGS

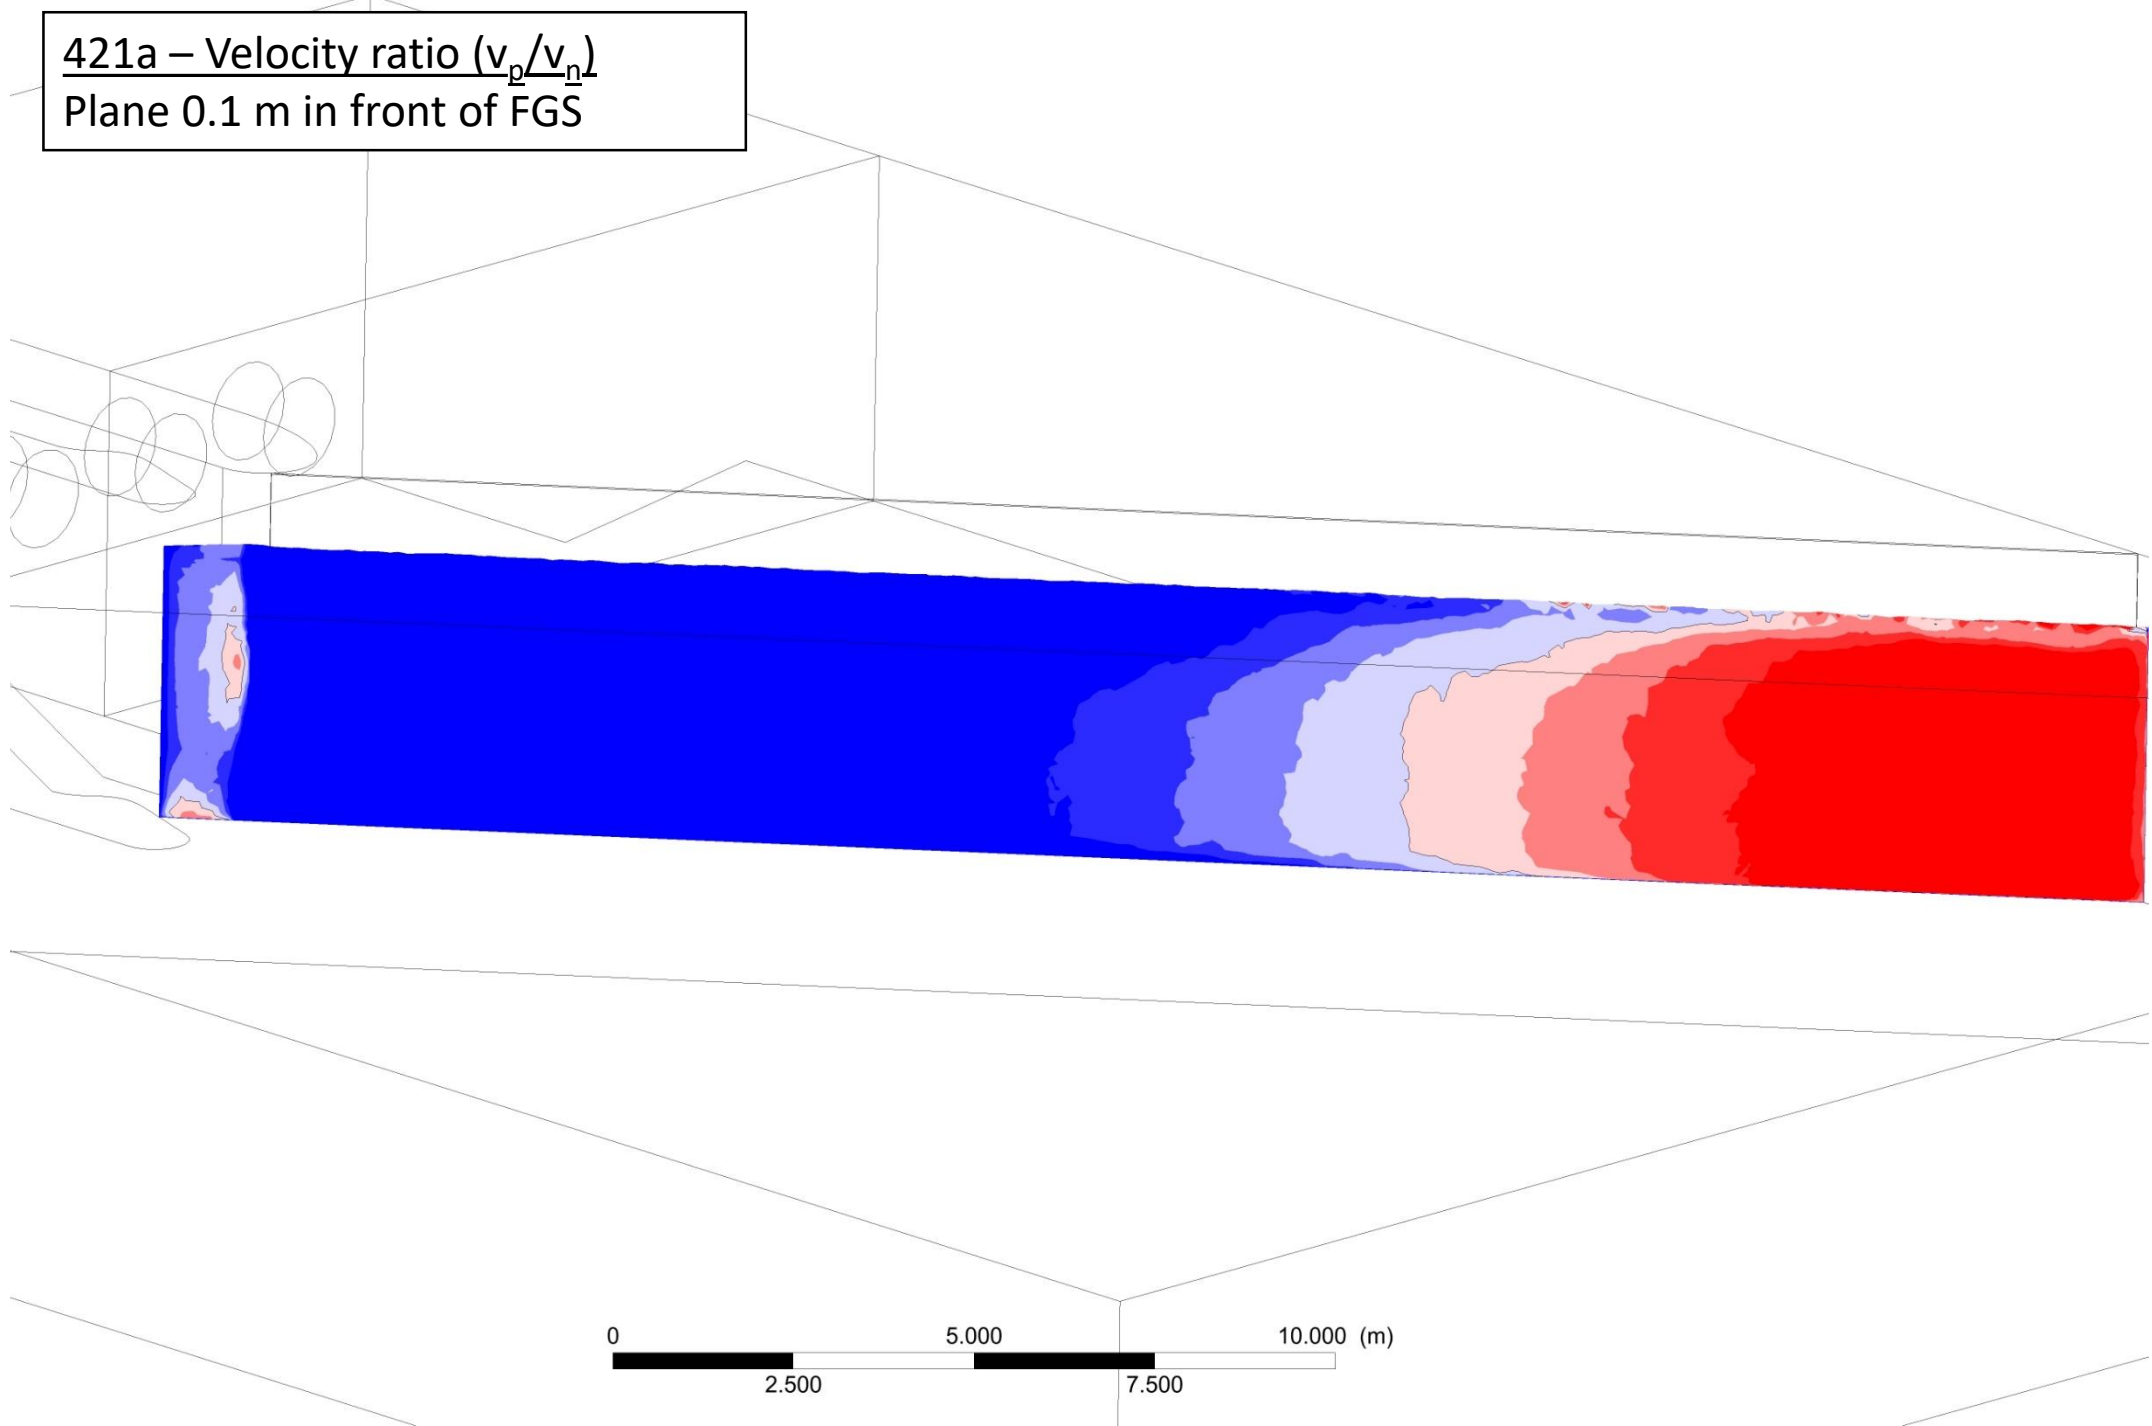



421a – Turbulence Kinetic Energy  
Plane 0.1 m in front of FGS

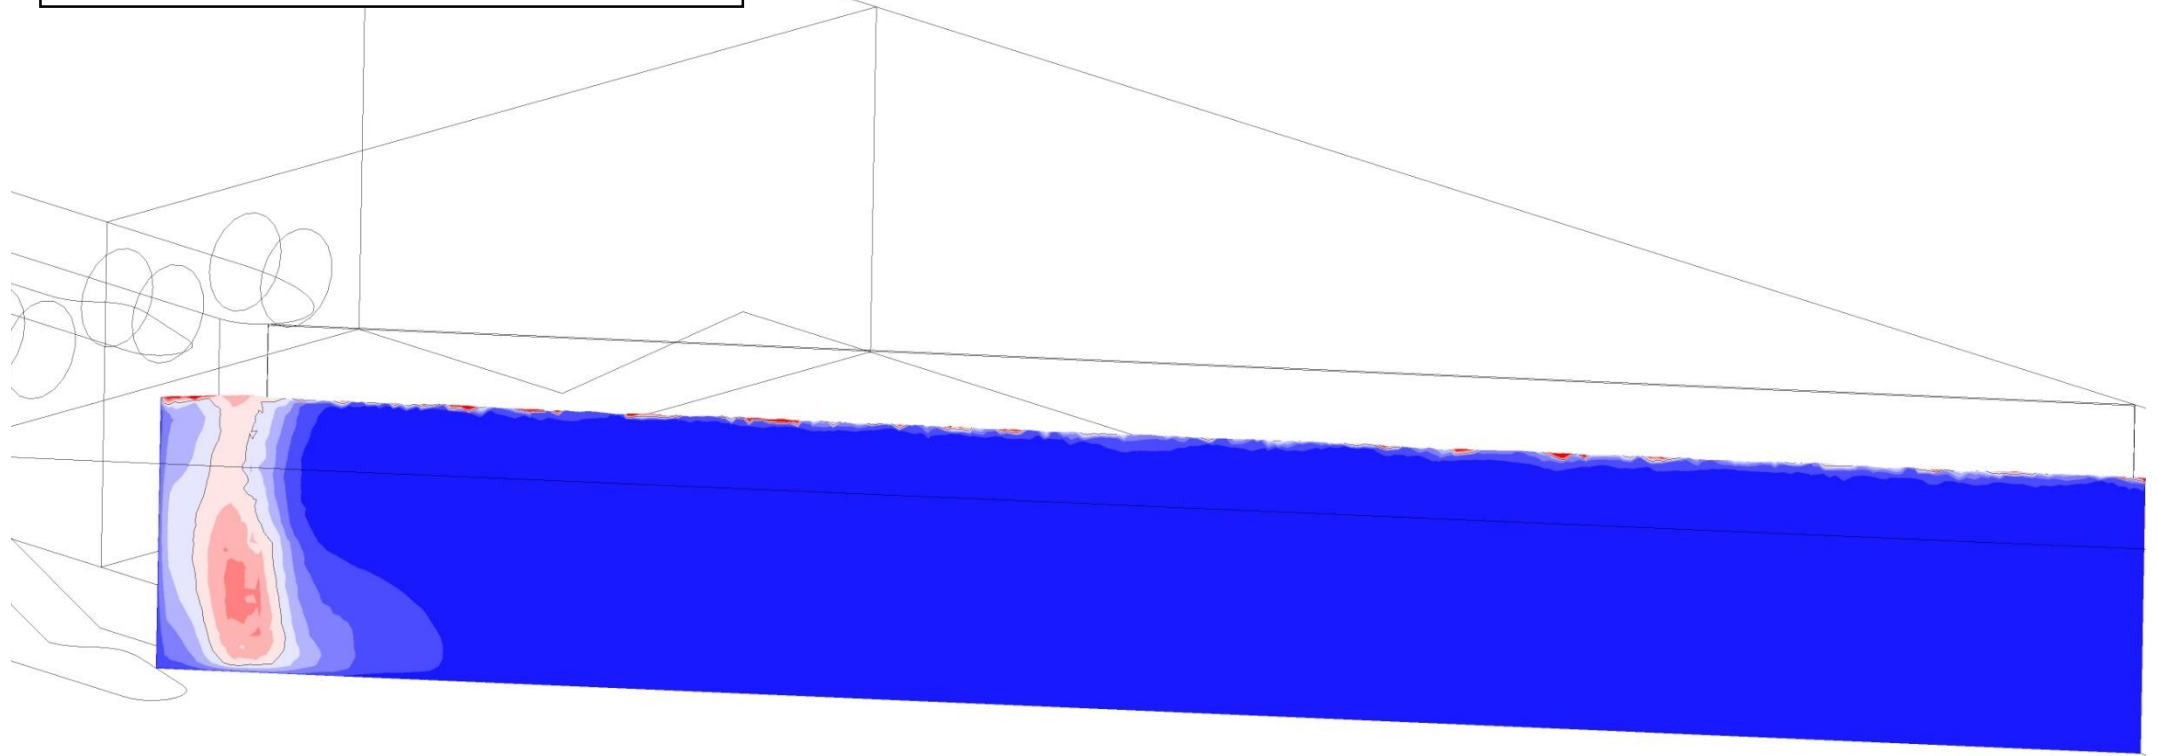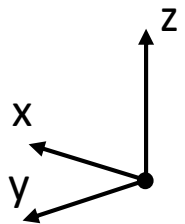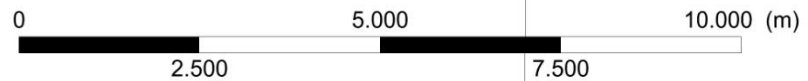

Velocity

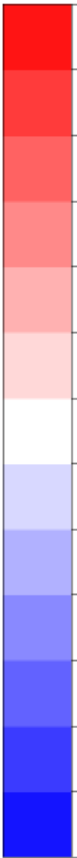

[m s<sup>-1</sup>]

421a – Velocity  
0, 1 and 2 m in the bypass entrance

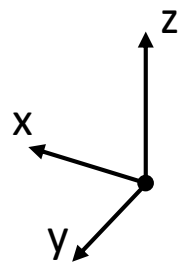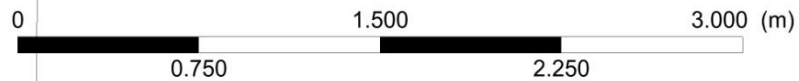





421a – Turbulence Kinetic Energy  
0, 1 and 2 m in the bypass entrance

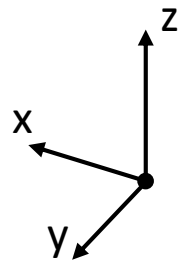

Supplement: s1 [file s1]
